# Supplementary material for: Harmonisation of later-life cognitive function across national contexts: results from the Harmonized Cognitive Assessment Protocols
Source: PubMed Central journal article supplement — Lancet Healthy Longev. Author manuscript; Available in PMC 2023 Nov 10. (PMC10637129; doi:10.1016/s2666-7568(23)00170-8), 2023-10
Supplement: NIHMS1935961-supplement-1.pdf [file NIHMS1935961-supplement-1.pdf]

# THE LANCET

## Healthy Longevity

### Supplementary appendix

This appendix formed part of the original submission and has been peer reviewed. We post it as supplied by the authors.

Supplement to: Gross AL, Li C, Briceño EM, et al. Harmonisation of later-life cognitive function across national contexts: results from the Harmonized Cognitive Assessment Protocols. *Lancet Healthy Longev* 2023; **4**: e573–83.

## Supplementary material

### Contents

- Prestatistical harmonization: Methods and Results – page 2
- Supplementary Table 1. Assignments of cognitive test items based on prestatistical and statistical procedures: Results from HCAP (N=21,144) – page 6
- HCAP-specific factor analyses – page 8
- Supplementary Table 2. Model fit statistics of CFAs for each cognitive domain in each study: Results from HCAP studies (N=21,144) – page 9
- Supplementary Methods: Does ordering of studies matter in the statistical co-calibration procedure that uses item banking? – page 11
- Supplementary Table 3. Information about HCAP studies – page 14
- Supplementary Table 4. Factor loadings of cognitive test items and item overlap across studies: Results from HCAP studies (N=21,144) – page 16
- Supplementary Table 5. Crosswalk between scaled educational attainment equivalents based on ISCED 2011 and education categories in each study – page 19
- Supplementary Table 6. Estimated thresholds and intercepts of cognitive test items: Results from HCAP studies (N=21,144) – page 20
- Supplementary Table 7. Results of differential item functioning among confident and tentative linking items for the language domain: Results from HCAP studies (N=21,144) – page 23
- Supplementary Table 8. Results of differential item functioning among confident and tentative linking items for the memory domain: Results from HCAP studies (N=21,144) – page 26
- Supplementary Table 9. Results of differential item functioning among confident and tentative linking items for the orientation domain: Results from HCAP studies (N=21,144) – page 29
- Supplementary Table 10. Validation of the domain-specific cognitive function factors: Results from HCAP studies (N=21,144) – page 32
- Supplementary Figure 1: Flowchart of item banking procedure implemented to statistically harmonize cognition across HCAP studies – page 34
- Supplemental Table 11. Number of participants with scores with salient DIF by HCAP study and cognitive domain, prior to DIF adjustment: Results from HCAP studies (N=21,144) – page 35

## Supplementary Methods: Prestatistical harmonization

The original HCAP test battery<sup>1</sup> in the US included tests of memory (CERAD word list-learning<sup>2</sup>, story recall from the Logical Memory Test and the East Boston Memory Test, three object recall), executive functioning (Letter Cancellation, Symbol Digit Modality Test,<sup>3,4</sup> HRS Number Series, Trail Making, Raven's Standard Progressive Matrices<sup>5</sup>), language (semantic fluency for animals, object naming)<sup>6</sup>, orientation to time and place, and visuospatial function (CERAD Constructional Praxis)<sup>7</sup>.

For linguistic, cultural, literacy, numeracy, and other reasons, each participating HCAP study adapted the neuropsychological battery for their study population. Adaptations to the HCAP battery included translations for test items and instructions, modifying administration and scoring procedures, changing test stimuli, and selecting alternative tests as necessary. Prestatistical review of the cognitive test items is necessary to determine that items are measuring cognitive constructs equivalently across linguistically, educationally, and culturally diverse populations. Determination of equivalent measures are necessary so that differences in the measures can be attributed to real differences between individuals and groups, instead of measurement-related differences. We seek to minimize between-study differences attributable to differences in test execution that might affect test score interpretations differently by study. Seemingly benign distinctions in test scoring, coding, or administration may have sizable effects on neuropsychological test interpretations, mean scores, and correlations with risk factors and outcomes.

Previous studies have described prestatistical harmonization procedures focusing on case examples between HCAPs in the US, Mexico, and India.<sup>8-10</sup> The present study leveraged and expanded on these previous efforts. To facilitate the decision-making required in prestatistical harmonization, we convened a multidisciplinary panel of professionals with cultural/linguistic expertise that included neuropsychologists, epidemiologists, psychometricians, and local study team members with cultural/linguistic expertise in the target populations with experience in administration of HCAPs (ALG, MAR, EMB, LCK). Most had working knowledge of cross-cultural neuropsychology. The team included two cultural neuropsychologists with expertise in Hispanic/Latinx populations (MAR, EMB). Additionally, the team included co-investigators on the HRS-HCAP (LCK), Mex-Cog (MAR), and LASI-DAD (ALG) studies, a former participant interviewer and database manager from the CHARLS-HCAP study (see acknowledgements), and a cognitive epidemiologist who assisted with training LASI-DAD field interviewers in India (ALG). From the HAALSI-HCAP, our team included an epidemiologist with fieldwork experience in South Africa's Agincourt sub-district and who participated in quality control efforts for the HAALSI study (LCK). The ELSA-HCAP's operations director joined meetings when we reviewed ELSA-HCAP (see acknowledgements), and other relevant experts were consulted while we conducted our prestatistical harmonization efforts for this study (see acknowledgements).

This group used available materials including codebooks, interviewer training manuals, and personal communication with study investigators and coordinators to document communalities and differences in test item content and administration across HCAPs. We determined which differences were substantial based on (1) reviews of procedural details involving test administration and scoring, (2) guidelines for coding of responses, and (3) when available, reviews of test item translations to examine construct equivalence of the item from a neuropsychological perspective. The latter entailed evaluation of cultural and linguistic equivalence. Cultural equivalence was ascertained by accounting for cultural familiarity of items. Linguistic equivalence consisted of studying translations of both test items themselves (e.g., are words from a word list learning task of similar imagery value, lexical frequency in the language, and syllabic count?) as well as instructions (e.g., are translated instructions comparably clear or complex in ways intended for the test?).

To facilitate detection of differential item functioning (DIF) among cross-HCAP linking items, described in the Methods, using the HRS-HCAP as the reference and based on available information, we rated each item from other HCAPs as a *confident linking item* that has no known issues with item equivalence, a *tentative linking item* that has possible issues with item equivalence based on reviews of differences described above, or a non-linking item based on available information.<sup>8,9</sup> As described in the Methods, we conducted DIF testing first among confident linking items, followed by testing among tentative linking items (where items confirmed as confident linking items were treated as anchors). One would hypothesize minimal evidence of DIF in items rated as confident linking items. But, importantly, DIF is still tested among confident linking items. Thus, any misclassification of linking items as confident when they should be tentative, or vice versa, will be rectified if such misclassification is not widespread. For this reason, we erred towards assigning items as tentative linking items, but balanced that decision against the number of available linking items in each domain.

The following sections summarize, by domain, rationales for assignment of cognitive test items as confident, tentative, or non-linking items. Supplementary Table 1 summarizes item classification.

57 **Prestatistical harmonization of orientation items**

58  
59 For the most part, cognitive test items assessing orientation to time and place were considered confident  
60 items, given their ease of translation at face value. There were exceptions: season of year was considered a tentative  
61 linking item in ELSA-HCAP, CHARLS-HCAP, and HAALSI-HCAP due to concerns regarding recognizability of  
62 seasons in and across these countries, some lack of clarity in documentation around how correct answers were coded  
63 (e.g., is Christmas accepted as a season, or are only weather patterns considered as correct responses?), and the local  
64 importance of tracking time in seasons (Supplementary Table 1).

65 Orientation to year is an item our team did anticipate concerns with because local study representatives did  
66 not flag them as major points of contention given the ease with which it can be translated, administered, and scored.  
67 Formal DIF testing suggested, however, that after controlling for underlying orientation ability as well as age and  
68 gender, performance on this item was much poorer in LASI-DAD and HAALSI-HCAP than in HRS-HCAP. Upon  
69 further scrutiny, we recognized that while this type of question may be translated, administered, and coded the same  
70 way across HCAPs, the degree to which it is a measure of cognitive orientation can vary. There are potential rationales  
71 for why asking older adults certain questions like orientation to year in contexts like India or South Africa are more  
72 difficult than in other contexts. Not all cultures rely on a Gregorian calendar system. Even if they do, there are rural  
73 areas in many countries in which calendar year may not be of large importance in the daily lives of many older adults.

74  
75 **Prestatistical harmonization of memory items**

76  
77 The primary memory tests in the original HCAP battery were CERAD word list learning and two story  
78 recall tests: Logical Memory and East Boston Memory Test. Other tests included delayed constructional praxis and  
79 three-word recall. During prestatistical harmonization, we determined the CERAD word recall test was administered  
80 comparably between HRS-HCAP, ELSA-HCAP, and CHARLS-HCAP but in a different way from LASI-DAD,  
81 Mex-Cog, and HAALSI-HCAP. Participants in the former three countries were presented with the words both  
82 verbally and visually, but in the latter three countries, participants were presented with the words only verbally.  
83 Moreover, while all studies presented the words verbally, there was variation in the order in which words were  
84 presented (i.e., alternating per trial vs fixed). In HRS-HCAP, the list of words is read in a different order in each of  
85 the three trials, while in Mex-Cog, LASI-DAD, and others, the intertrial order of the word list is fixed. Because of  
86 these distinctions, we considered the CERAD word recall test a linking item between HRS-HCAP, ELSA-HCAP,  
87 and CHARLS-HCAP, as well as between LASI-DAD, Mex-Cog, and HAALSI-HCAP, but as a non-linking item  
88 between these two sets. These were confident linking items except for CHARLS-HCAP: although administration  
89 procedures were similar to HRS-HCAP and ELSA-HCAP, there were questions around the familiarity of certain  
90 words in the list. For example, *butter* and *beach* are uncommon Mandarin terms for many older adults in China.

91 Regarding story recall tests, we considered these as linking items across all HCAPs, albeit usually as  
92 tentative due to questions around coding, scoring, and translations. The link between HRS-HCAP and LASI-DAD's  
93 story recall items was considered confident because despite having 13 translations into different languages of the  
94 HCAP battery in India, the LASI-DAD battery and materials were rigorously back-translated and pilot tested. A  
95 previous study investigated measurement invariance of the HCAP battery by language in India, and found little  
96 evidence of language differences.<sup>11</sup> Scoring across HCAPs was conducted in a way that allowed "exact" and "gist"  
97 coding of responses. In exact or precise scoring, respondents are expected to recollect exact details of each story  
98 element. In gist scoring, points are awarded for recalling a story element's main idea.<sup>8</sup> In this study, we relied on gist  
99 or approximate scoring as this approach provided greater variability in observed scores in HAALSI-HCAP, LASI-  
100 DAD, CHARLS-HCAP, and Mex-Cog. In all studies for which instruments were translated into different languages,  
101 there was uncertainty about comparability due to various idiosyncrasies around translation. Some story elements  
102 might have varying difficulty in different languages. Place names that were adapted for the local population may  
103 have varying familiarity to local respondents, as compared to the original English version. Further discussion of this  
104 is available in Briceño et al.<sup>8</sup>

105 The link between story recall in HRS-HCAP and ELSA-HCAP was tentative because coding instructions in  
106 the latter study appeared to follow stricter criteria than the Wechsler Memory Scale-Fourth Edition (WMS-IV)  
107 criteria<sup>3</sup> used in HRS-HCAP, Mex-Cog, and others: interviewers were instructed to "only code if respondent  
108 mentions underlined words/phrases." For example, recalling a minor variation of the name of the individual in the  
109 story, which is a story element, would be incorrect according to interviewer instructions in ELSA-HCAP.

110 For story recall in HAALSI-HCAP, as in all HCAPs, character names and places in the stories were  
111 changed to make it more relatable to the South African population. For the Logical Memory test, the maximum  
112 number of points was 24 in HAALSI-HCAP while 25 points were possible in all other HCAPs because of one

113 missing story element. Instead of “Anna Thompson of South Boston,” where “south” is considered a story element,  
114 HAALSI-HCAP’s adaptation was, “Anna Khosa of Johannesburg.”

### 115 116 **Prestatistical harmonization of executive functioning items**

117  
118 Tests considered in the executive functioning domain, which includes tasks spanning problem-solving, set-  
119 shifting, attentional control, and processing speed, were very similar between HRS-HCAP and ELSA-HCAP.  
120 Several of these tests, such as Number Series and Letter Cancellation, have been commonly administered in studies  
121 in the US and England for decades. No language translation was necessary, and scrutiny of test administration,  
122 coding, and scoring revealed no concerns. There was extensive discussion around whether ELSA-HCAP’s Letter  
123 Cancellation task was done on A4-sized paper (210 x 297 mm, common in the UK) instead of letter-sized paper  
124 (215.9 x 279.4 mm, common in the US) and whether this meant more rows of letters were provided or font sizes  
125 differed. We were relieved to learn ELSA-HCAP used letter-sized papers for that test.

126 Due to numeracy and literacy differences, most tests in the executive functioning domain were infeasible in  
127 other HCAPs. Raven’s progressive matrices could be administered in LASI-DAD and HAALSI-HCAP, while serial  
128 7s was administered everywhere outside of HRS-HCAP. Otherwise, this domain proved a hotbed of innovation  
129 across HCAPs as each study used different instruments. As evidenced by common tests in this domain among Mex-  
130 Cog, LASI-DAD, and HAALSI-HCAP, investigative teams in these studies shared recommended practices. Some of  
131 these tests included Go-No-Go, Similarities and Differences, backwards day naming (to replace serial 7s and  
132 spelling a word backwards), and a Symbol Cancellation Test (to replace the Symbol Digit Modalities test  
133 administered in HRS-HCAP and ELSA-HCAP). In general, investigators shared administration and coding  
134 instructions for these instruments, for which translations of stimuli and instructions were straightforward compared  
135 to items from the memory domain.

### 136 137 **Prestatistical harmonization of language items**

138  
139 Language tests across HCAP studies included semantic fluency for animals, a variety of naming tasks  
140 (parts of the body, common objects, confrontational naming, etc.), and following commands (point to 2 things in the  
141 vicinity; read and follow a written command).

142 We considered animal fluency a confident linking item across all HCAPs. There were no strong indications  
143 of differences in administration, scoring, or coding of this item. Regarding use in different language groups and  
144 cultures, previous studies have found no evidence of sizable measurement differences in animal fluency between  
145 English and Spanish<sup>12</sup> and English and Arabic.<sup>13</sup> Despite our final confidence rating, we did discuss this item at  
146 length; in no existing HCAP are imaginary animals (e.g., unicorns, mermaids) acceptable responses. There was  
147 extensive discussion about what this test is intended to represent. Generally, tests of semantic fluency assess the  
148 ability to generate words from a specific semantic category, such as animals, vegetables, or fruits, within a certain  
149 time limit (in HCAPs, 60 seconds). Semantic fluency tests measure one’s language abilities to access previously  
150 acquired semantic knowledge and generative fluency related to the cognitive constructs of semantic memory and  
151 executive functions.<sup>14</sup> Although animal types and names are not necessarily an overlearned feature in all cultures  
152 and countries starting from childhood,<sup>15,16</sup> animals are thought to be a universal category familiar to most individuals  
153 across different cultures and languages.

154 Object naming tests are popular measures of receptive and expressive language abilities. Assessing an  
155 individual’s ability to retrieve or to produce object names depends on the stimulus used and the salience of that  
156 stimulus with one’s lived experiences in a cultural setting. The original HCAP battery included questions about  
157 receptive and expressive language abilities by requiring individuals to name an item given a specific prompt.<sup>1</sup> For  
158 example, a cactus (*What do you call the kind of prickly plant that grows in the desert?*) or scissors (*What do people*  
159 *usually use to cut paper?*) Cognitive test items assessing receptive language ability for which the stimuli were changed  
160 were considered non-linking items for purposes of cross-national harmonization. For example, since cacti are not  
161 native to many parts of the world, this item has been substituted with varying degrees of success in other countries; in  
162 India, the LASI-DAD study asked participants “*What is a brown nut that contains milk?*” (coconut). The cactus item  
163 was also administered in CHARLS-HCAP, and while we initially considered it a tentative linking item, evaluation of  
164 DIF revealed significant differences in that item between HRS-HCAP and CHARLS-HCAP. We subsequently  
165 recognized that 61% of the CHARLS-HCAP sample responded “Don’t know” to this item, which is more than 1.5  
166 times the number of respondents who correctly or incorrectly answered it. This finding suggests cacti are not well-  
167 recognized plants in China, and thus this is a non-linking item between HRS-HCAP and CHARLS-HCAP.

168 To assess confrontational naming, participants were shown common objects and asked to name them. In most  
169 HCAPs, participants were shown the physical objects, whereas in CHARLS-HCAP participants were shown a 2-  
170 dimensional color picture of the objects. Thus, we considered these as tentative linking items between CHARLS-  
171 HCAP and other studies.

172 For object naming, in addition to considerations of the actual stimulus provided (e.g., cacti vs coconuts),  
173 scoring rules matter. For example, *what do people usually use to cut paper?* The most correct answer is scissors, but  
174 pen knives for opening letters are common as well. Because of differences in scoring rules, we considered this a  
175 tentative linking item in Mex-Cog vs other studies but a confident linking item across all other HCAPs. As mentioned  
176 earlier in this section, we were not greatly concerned with misclassification of items as confident when they should  
177 be tentative, as long as we were certain such misclassification was limited.

178 A common test of language ability is to ask a participant to read a command and do what it says (e.g., *Close*  
179 *your Eyes*). As the goal of the test is not to disadvantage illiterate people, an adaptation in several HCAP studies  
180 (LASI-DAD, CHARLS-HCAP) was made to, “Do what I [interviewer] am doing.” The interviewer then demonstrates  
181 the task. Such an adaptation would be considered a non-linking item because the original task requires a respondent  
182 to successfully read a command, interpret words into actions, and then do the written command. If a person does not  
183 read the stimulus, a crucial step of translating words into action is lost. Following evaluation of DIF, we found the  
184 variable in CHARLS-HCAP did not make a distinction between whether people read the instruction or imitated the  
185 interviewer; thus, this item had to be considered unique to CHARLS-HCAP and different from the instruction to read  
186 (available in most HCAPs) as well as the imitated-only instruction among illiterate participants in LASI-DAD.

#### 187 **References for Supplementary Materials on Prestatistical Harmonization**

- 188 1. Langa KM, Ryan LH, McCammon RJ, et al. The health and retirement study harmonized cognitive  
189 assessment protocol project: Study design and methods. *Neuroepidemiology* 2020; 54: 64–74.
- 190 2. Strauss ME, Fritsch T. Factor structure of the CERAD neuropsychological battery, *J Int Neuropsychol Soc*  
191 2004; 10: 559-65.
- 192 3. Wechsler D. 2009. *Wechsler Memory Scale - WMS-IV Technical and Interpretive Manual - Fourth Edition*  
193 (Pearson: San Antonio, TX).
- 194 4. Lowery N, Ragland JD, Gur RC, Gur RE, Moberg PJ. Normative data for the symbol cancellation test in  
195 young healthy adults. *Appl Neuropsychol* 2004; 11: 218-21.
- 196 5. Raven J. The Ravens progressive matrices: change and stability over culture and time, *Cogn Psychol* 2000;  
197 41: 1-48.
- 198 6. Henry JD, Crawford JR, Phillips LH. Verbal fluency performance in dementia of the Alzheimers type: a  
199 meta-analysis, *Neuropsychologia* 2004; 42: 1212-22.
- 200 7. Yuspeh RL, Vanderploeg RD, Kershaw DAJ. CERAD Praxis memory and recognition in relation to other  
201 measures of memory, *Clinical Neuropsychologist* 1998; 12: 468-74.
- 202 8. Briceño EM, Arce Rentería M, Gross AL, et al. A cultural neuropsychological approach to harmonization  
203 of cognitive data across culturally and linguistically diverse older adult populations, *Neuropsychology*  
204 2023; 37: 247-57.
- 205 9. Arce Rentería M, Briceño EM, Chen D, et al. Memory and language cognitive data harmonization between  
206 the United States and Mexico. *Alzheimer's & Dementia: Diagnosis, Assessment & Disease Monitoring*  
207 2023, in press.
- 208 10. Vonk JMJ, Gross AL, Zammit AR, et al. Cross-national harmonization of cognitive measures across HRS  
209 HCAP (USA) and LASI-DAD (India). *PLoS One* 2022;17(2).
- 210 11. Gross AL, Khobragade PY, Meijer E, Saxton JA. Measurement and Structure of Cognition in the  
211 Longitudinal Aging Study in India—Diagnostic Assessment of Dementia. *J Am Geriatr Soc* 2020;68(S3).
- 212 12. Siedlecki KL, Manly JJ, Brickman AM, Schupf N, Tang MX, Stern Y. Do neuropsychological tests have  
213 the same meaning in Spanish speakers as they do in English speakers? *Neuropsychology* 2010;24(3):402-  
214 411.
- 215 13. Zahodne LB, Brauer S, Tarraf W, Morris EP, Antonucci TC, Ajrouch KJ. Measurement and structural  
216 invariance of a neuropsychological battery among Middle Eastern/North African, Black, and White Older  
217 Adults. *Neuropsychology* 2023; in press.
- 218 14. Lezak MD. 2004. *Neuropsychological assessment* (Oxford University Press: Oxford; New York).
- 219 15. Scarry S. 1999. *Richard Scarry's Best Word Book Ever* (Random House Childrens Books).
- 220 16. Carle E. 2019. *Eric Carle's Book of Many Things* (World of Eric Carle).

223 **Supplementary Table 1. Assignments of cognitive test items based on prestatistical and statistical procedures:**  
 224 **Results from HCAP (N=21,144)**

| Variable                                      | HRS-HCAP     | ELSA-HCAP | LASI-DAD      | Mex-Cog   | CHARLS-HCAP | HAALSI-HCAP   |
|-----------------------------------------------|--------------|-----------|---------------|-----------|-------------|---------------|
| <b>Orientation</b>                            |              |           |               |           |             |               |
| Day of month                                  | Administered | Confident | Confident     | Confident | Confident   | Confident     |
| Month                                         | Administered | Confident | Confident     | Confident | Confident   | Confident     |
| Year                                          | Administered | Confident |               | Confident | Confident   |               |
| Year (DIF adjusted)                           |              |           | DIF-corrected |           |             | DIF-corrected |
| Day of the week                               | Administered | Confident | Confident     | Confident | Confident   | Confident     |
| What time is it                               |              |           |               | Novel     |             | Novel         |
| Where are we                                  |              |           |               | Unique    |             |               |
| What country are we in                        |              | Novel     |               | Novel     |             | Novel         |
| What state are we in                          | Administered |           | Confident     | Confident | Confident   | Confident     |
| What county are we in                         | Administered | Tentative |               |           | Confident   |               |
| What city are we in                           | Administered | Confident | Confident     |           | Confident   | Confident     |
| Season of year                                | Administered | Tentative | Confident     |           | Tentative   | Tentative     |
| Floor of building                             | Administered |           | Tentative     |           | Confident   | Tentative     |
| Address (street name and/or building number)  | Administered | Tentative | Tentative     |           | Confident   |               |
| Name of hospital or district/municipality     |              |           | Novel         |           |             | Novel         |
| <b>Memory</b>                                 |              |           |               |           |             |               |
| CERAD immediate sum of 3 trials               | Administered | Confident |               |           | Tentative   |               |
| CERAD immediate sum of 3 trials               |              |           | Novel         | Novel     |             | Novel         |
| CERAD word list delay                         | Administered | Confident |               |           | Tentative   |               |
| CERAD word list delay                         |              |           | Novel         | Novel     |             | Novel         |
| CERAD recognition                             | Administered | Confident |               |           | Tentative   |               |
| CERAD recognition                             |              |           | Novel         | Novel     |             | Novel         |
| Three word immediate registration             | Administered | Confident | Confident     | Tentative | Confident   | Confident     |
| Three word delayed recall                     | Administered | Confident | Confident     | Tentative | Confident   | Confident     |
| Logical Memory immediate                      | Administered | Tentative | Confident     | Tentative |             | Tentative     |
| Logical Memory delay                          | Administered | Tentative | Confident     | Tentative |             | Tentative     |
| Logical memory recognition                    | Administered | Tentative | Confident     |           |             | Tentative     |
| Brave man immediate (East Boston Memory Test) | Administered | Tentative | Confident     | Tentative |             |               |
| Brave man delay (East Boston Memory Test)     | Administered | Tentative | Confident     | Tentative |             |               |
| CERAD constructional praxis delay             | Administered | Confident | Tentative     | Confident |             | Tentative     |
| <b>Executive functioning</b>                  |              |           |               |           |             |               |
| Problem solving                               |              |           | Unique        |           |             |               |
| Ravens progressive matrices                   | Administered | Confident | Tentative     |           |             | Tentative     |
| HRS Number series                             | Administered | Confident |               |           |             |               |
| Number series                                 |              |           |               |           | Unique      |               |
| Trails A time (letters and numbers)           | Administered | Confident |               |           |             |               |
| Trails B time (letters and numbers)           | Administered | Confident |               |           |             |               |
| Similarities                                  |              |           | Novel         | Novel     |             | Novel         |
| Token Test                                    |              |           | Novel         |           |             | Novel         |
| Digit Span Forward (single item)              |              |           | Unique        |           |             |               |
| Digit Span Backward (single item)             |              |           | Unique        |           |             |               |
| Digit Span Forward (multiple items)           |              |           |               |           |             | Unique        |
| Digit Span Backward (multiple items)          |              |           |               |           |             | Unique        |
| Go-No-Go                                      |              |           | Novel         | Novel     |             | Novel         |
| Motor Programming                             |              |           |               |           |             | Unique        |

|                                           |              |           |           |           |           |           |           |
|-------------------------------------------|--------------|-----------|-----------|-----------|-----------|-----------|-----------|
| MMSE Spelling backwards                   | Administered |           |           |           |           |           |           |
| Backward counting, 100-0                  | Administered | Confident |           |           |           |           |           |
| Backward counting, 20-0                   |              |           |           |           | Unique    |           |           |
| Symbol Digit Modalities Test *            | Administered | Confident |           |           |           |           |           |
| Symbols and Digits test **                |              |           |           |           | Unique    |           |           |
| Symbol Cancellation Test                  |              |           | Novel     |           | Novel     |           | Novel     |
| Letter cancellation                       | Administered | Confident |           |           |           |           |           |
| Serial 3s                                 |              |           |           |           | Unique    |           |           |
| Serial 7s                                 |              | Novel     | Novel     |           | Novel     | Novel     | Novel     |
| Backward Day naming                       |              |           | Novel     |           |           |           | Novel     |
| Forward day naming                        |              |           |           |           |           |           | Unique    |
| CDR calculation-cent                      |              |           |           |           |           |           | Unique    |
| <b>Language</b>                           |              |           |           |           |           |           |           |
| Animal fluency                            | Administered | Confident | Confident | Confident | Confident | Confident | Confident |
| Name a described cactus                   | Administered | Confident |           |           |           |           |           |
| Name a described cactus (DIF adjusted)    |              |           |           |           |           | Unique    |           |
| Name a described coconut                  |              |           |           | Unique    |           |           |           |
| What are scissors used for?               | Administered | Confident | Confident | Tentative | Confident | Confident | Confident |
| Object naming (watch)                     | Administered |           | Confident | Tentative | Tentative | Confident | Confident |
| Object naming (pencil)                    | Administered |           | Confident | Confident | Tentative | Confident | Confident |
| Name the elbow                            | Administered | Confident | Confident | Confident | Confident | Confident | Confident |
| Write a sentence (or write one's name)    | Administered | Tentative | Confident | Tentative | Confident | Confident | Tentative |
| Say a sentence                            |              |           |           |           |           |           |           |
| Read and follow command (Close your eyes) | Administered | Confident | Confident | Confident |           |           | Confident |
| Read and follow command (DIF adjusted)    |              |           |           |           |           | Unique    |           |
| Follow example (close your eyes)          |              |           |           |           |           | Unique    |           |
| Repetition of a phrase                    | Administered | Confident | Tentative | Tentative | Confident | Confident | Confident |
| What does one do with a hammer            | Administered | Confident | Tentative | Tentative | Confident | Confident | Tentative |
| Define Bridge                             |              |           |           |           | Unique    |           |           |
| Point to 2 things in the vicinity         | Administered | Confident | Confident | Confident | Confident | Confident | Confident |
| Where is the local market?                | Administered | Tentative | Tentative | Tentative | Tentative | Tentative | Tentative |
| Follow 3-stage instruction                | Administered | Confident | Confident | Confident |           |           | Confident |
| Name president or Prime Minister          | Administered | Confident | Confident |           |           | Confident | Confident |
| Name deputy president                     |              |           |           |           |           |           | Unique    |
| Phonemic Fluency                          |              |           |           |           |           |           | Unique    |
| Boston Naming Test, uncued                |              |           |           |           |           |           | Unique    |

225 Legend. Confident and tentative linking items are as described in the Methods. Unique items are those administered  
226 in a single study. Novel items are administered in more than one HCAP but not in HRS-HCAP; DIF testing was not  
227 conducted for these items but most were judged to be confident linking items in reference to Mex-Cog. Unique and  
228 novel items are non-linking items.

229



## Supplementary Methods: HCAP-specific factor analyses

### Methods

To illustrate empirically that similar organizations of cognitive test items fit well across countries prior to imposing assumptions about cross-national linking items, we estimated confirmatory factor analysis (CFA) models for cognitive domains of general and domain-specific cognitive function separately for each HCAP study. The CFA models estimated two relevant parameters for each cognitive test item: factor loadings, and item thresholds (for categorical items) or intercepts (for continuous items). Factor loadings characterize how strongly correlated a cognitive test item is with the other items in the model. In general, loadings between 0.3 and 0.9 indicate an item is meaningfully related to other items without overwhelming other items in the model.<sup>1,2</sup> Item thresholds characterize the location along the factor at which the cognitive test item provides maximal information regarding underlying cognitive function. We ascertained model fit for CFAs using three standard fit statistics: the Root Mean Square Error of Approximation (RMSEA), Comparative Fit Index (CFI), and Standardized Root Mean Residual (SRMR).<sup>3</sup> When possible, we improved model fit through the use of bifactor models to address additional correlations between similar items (e.g., immediate and delayed recall).<sup>1,2</sup> From these fit statistics, we summarized model fit using the following guidelines that have been described in prior research.<sup>4</sup> Model fit was considered perfect if CFI = 1 and RMSEA = 0 and SRMR = 0, good if CFI ≥ 0.95 and RMSEA ≤ 0.05 and SRMR ≤ 0.05, adequate if CFI ≥ 0.90 and RMSEA ≤ 0.08 and SRMR ≤ 0.08, and poor if either CFI < 0.9 or RMSEA > 0.08 or SRMR > 0.08. We chose this combination because each fit statistic has advantages and disadvantages. Together, these three statistics considered in conjunction minimize the risk of choosing a bad model. Although low SRMR implies low model residuals, it does not incorporate model complexity and may be partial to overly complex models or models with larger sample sizes. The RMSEA provides an index of model discrepancy per degree of freedom (which accounts for model complexity), but tends to improve with larger sample size. The CFI compares an estimated model with a hypothetical null baseline model.

### Results

**Supplementary Table 10** displays model fit statistics for measurement models of each of the five cognitive domains, by each of the seven study groups (six HCAP studies with LASI-DAD stratified by literacy). Of these 35 measurement models, 31% (11 models) were of perfect or good fit, 57% (20 models) were of adequate fit, and the remaining 11% (4 models) were of poor fit. The single “perfect” model, for executive functioning in CHARLS-HCAP, included only 2 indicators, and thus was a saturated model. Two of the four poorly fitting models were in the general cognitive function domain. Ultimately, we proceeded with these factor structures because most model fits, including all for HRS-HCAP, were good or adequate.

#### References for Supplementary material on HCAP-specific factor analyses

1. Mukherjee S, Choi S-E, Lee ML, *et al.* Cognitive domain harmonization and cocalibration in studies of older adults. *Neuropsychology* 2022; **37**(4):409-423.
2. Gibbons RD, Bock RD, Hedeker D, *et al.* Full-information item bifactor analysis of graded response data. *Applied Psychological Measurement* 2007; **31**: 4–19.
3. Hu LT, Bentler PM. Cutoff criteria for fit indexes in covariance structure analysis: Conventional criteria versus new alternatives. *Structural Equation Modeling* 1999;6(1).
4. Gross AL, Khobragade PY, Meijer E, Saxton JA. Measurement and Structure of Cognition in the Longitudinal Aging Study in India—Diagnostic Assessment of Dementia. *J Am Geriatr Soc* 2020;68: S11-9.

**Supplementary Table 2. Model fit statistics of CFAs for each cognitive domain in each study: Results from HCAP studies (N=21,144)**

| Cognitive domain      | Study                 | Number of items | RMSEA | CFI   | SRMR  | Bifactor structure | Summary of fit |
|-----------------------|-----------------------|-----------------|-------|-------|-------|--------------------|----------------|
| General cognition     | HRS-HCAP              | 45              | 0.035 | 0.925 | 0.078 | Yes                | Adequate       |
| General cognition     | ELSA-HCAP             | 41              | 0.027 | 0.968 | 0.089 | Yes                | Poor           |
| General cognition     | LASI-DAD - literate   | 48              | 0.033 | 0.904 | 0.066 | Yes                | Adequate       |
| General cognition     | LASI-DAD - illiterate | 48              | 0.036 | 0.904 | 0.063 | Yes                | Adequate       |
| General cognition     | Mex-Cog               | 40              | 0.040 | 0.932 | 0.072 | Yes                | Adequate       |
| General cognition     | CHARLS-HCAP           | 31              | 0.032 | 0.949 | 0.051 | No                 | Adequate       |
| General cognition     | HAALSI-HCAP           | 51              | 0.043 | 0.913 | 0.122 | Yes                | Poor           |
| Memory                | HRS-HCAP              | 11              | 0.045 | 0.980 | 0.023 | Yes                | Good           |
| Memory                | ELSA-HCAP             | 11              | 0.060 | 0.971 | 0.038 | Yes                | Adequate       |
| Memory                | LASI-DAD - literate   | 11              | 0.046 | 0.978 | 0.027 | Yes                | Good           |
| Memory                | LASI-DAD - illiterate | 11              | 0.049 | 0.965 | 0.031 | Yes                | Good           |
| Memory                | Mex-Cog               | 10              | 0.048 | 0.985 | 0.033 | Yes                | Good           |
| Memory                | CHARLS-HCAP           | 5               | 0.047 | 0.984 | 0.020 | No                 | Good           |
| Memory                | HAALSI-HCAP           | 9               | 0.026 | 0.995 | 0.018 | Yes                | Good           |
| Orientation           | HRS-HCAP              | 10              | 0.028 | 0.971 | 0.064 | No                 | Adequate       |
| Orientation           | ELSA-HCAP             | 9               | 0.010 | 0.999 | 0.052 | No                 | Adequate       |
| Orientation           | LASI-DAD - literate   | 10              | 0.053 | 0.924 | 0.077 | Yes                | Adequate       |
| Orientation           | LASI-DAD - illiterate | 10              | 0.049 | 0.945 | 0.064 | Yes                | Adequate       |
| Orientation           | Mex-Cog               | 8               | 0.062 | 0.924 | 0.066 | No                 | Adequate       |
| Orientation           | CHARLS-HCAP           | 10              | 0.043 | 0.968 | 0.051 | No                 | Adequate       |
| Orientation           | HAALSI-HCAP           | 10              | 0.032 | 0.989 | 0.069 | No                 | Adequate       |
| Language              | HRS-HCAP              | 14              | 0.020 | 0.971 | 0.071 | No                 | Adequate       |
| Language              | ELSA-HCAP             | 12              | 0.007 | 0.997 | 0.070 | Yes                | Adequate       |
| Language              | LASI-DAD - literate   | 14              | 0.034 | 0.897 | 0.070 | Yes                | Poor           |
| Language              | LASI-DAD - illiterate | 14              | 0.032 | 0.949 | 0.050 | Yes                | Adequate       |
| Language              | Mex-Cog               | 13              | 0.016 | 0.986 | 0.073 | Yes                | Adequate       |
| Language              | CHARLS-HCAP           | 13              | 0.029 | 0.960 | 0.046 | No                 | Good           |
| Language              | HAALSI-HCAP           | 16              | 0.039 | 0.971 | 0.127 | Yes                | Poor           |
| Executive functioning | HRS-HCAP              | 8               | 0.076 | 0.973 | 0.020 | Yes                | Adequate       |
| Executive functioning | ELSA-HCAP             | 8               | 0.080 | 0.966 | 0.020 | Yes                | Adequate       |
| Executive functioning | LASI-DAD - literate   | 10              | 0.029 | 0.989 | 0.024 | No                 | Good           |
| Executive functioning | LASI-DAD - illiterate | 10              | 0.038 | 0.975 | 0.034 | No                 | Good           |
| Executive functioning | Mex-Cog               | 7               | 0.043 | 0.995 | 0.018 | Yes                | Good           |
| Executive functioning | CHARLS-HCAP           | 2               | 0.000 | 1.000 | 0.000 | No                 | Perfect        |
| Executive functioning | HAALSI-HCAP           | 12              | 0.076 | 0.922 | 0.059 | Yes                | Adequate       |

Legend. CFI: confirmatory fit index; RMSEA: root mean square error of approximation; SRMR: standardized root mean squared residual.

Using the combination of the RMSEA, CFI, and SRMR, we summarized model fit as perfect, good, adequate, or poor. Model fit was considered perfect if  $CFI = 1$  and  $RMSEA = 0$  and  $SRMR = 0$ , good if  $CFI \geq 0.95$  and  $RMSEA \leq 0.05$  and  $SRMR \leq 0.05$ , adequate if  $CFI \geq 0.90$  and  $RMSEA \leq 0.08$  and  $SRMR \leq 0.08$ , and poor if either  $CFI < 0.9$  or  $RMSEA > 0.08$  or  $SRMR > 0.08$ . We chose this combination because each fit statistic has advantages and disadvantages. Together, these three statistics considered in conjunction minimize the risk of choosing a bad model. Although low SRMR implies low model residuals, it does not incorporate model complexity and may be partial to

overly complex models or models with larger sample sizes. The RMSEA provides an index of model discrepancy per degree of freedom (which accounts for model complexity), but tends to improve with larger sample size. The CFI compares an estimated model with a hypothetical null baseline model.

## Supplementary Methods: Does ordering of studies matter in the statistical co-calibration procedure that uses item banking?

Based on knowledge of factor analysis and statistical co-calibration, one should expect the ordering in which studies are added should not greatly affect the distributions of harmonized factor scores or cross-study comparisons. This is because, if the prestatistical harmonization was rigorous in its identification of linking items, then in the absence of strong DIF in many cognitive test items, the relative ranking of people (and studies) should be relatively unaffected.

To address the question of whether ordering matters, in a limited sensitivity analysis we re-arranged the order of studies in our item banking procedure 3 times. The first scenario was the original, with an ordering of studies of HRS-HCAP, ELSA-HCAP, LASI-DAD (literate then illiterate), Mex-Cog, CHARLS-HCAP, and HAALSI-HCAP. The ordering of studies in the second scenario was LASI-DAD (illiterate then literate), CHARLS-HCAP, Mex-Cog, HAALSI-HCAP, ELSA-HCAP, and HRS-HCAP. The ordering of studies in the third scenario was CHARLS-HCAP, HAALSI-HCAP, LASI-DAD (illiterate then literate), Mex-Cog, HRS-HCAP, and ELSA-HCAP. We did not estimate scores for every possible ordering of studies, but based on methodological theory, that is probably not necessary.

Below is a table showing overall and study-specific correlations among the ordering scenarios for general cognitive function and each domain-specific score. General cognitive scores from all ordering scenarios are highly correlated with each other ( $r>0.96$ ).

| Domain                        | Correlation               | Overall | HRS-HCAP | ELSA-HCAP | LASI-DAD (literate) | LASI-DAD (illiterate) | Mex-Cog | CHARLS-HCAP | HAALSI-HCAP |
|-------------------------------|---------------------------|---------|----------|-----------|---------------------|-----------------------|---------|-------------|-------------|
| General cognitive performance |                           |         |          |           |                     |                       |         |             |             |
|                               | Corr(scenario1,scenario2) | 0.963   | 0.985    | 0.988     | 0.993               | 0.995                 | 0.992   | 0.963       | 0.995       |
|                               | Corr(scenario1,scenario3) | 0.984   | 0.989    | 0.990     | 0.990               | 0.990                 | 0.995   | 0.975       | 0.994       |
|                               | Corr(scenario2,scenario3) | 0.970   | 0.990    | 0.990     | 0.988               | 0.992                 | 0.991   | 0.987       | 0.989       |
| Orientation                   |                           |         |          |           |                     |                       |         |             |             |
|                               | Corr(scenario1,scenario2) | 0.923   | 0.945    | 0.959     | 0.944               | 0.947                 | 0.883   | 0.916       | 0.951       |
|                               | Corr(scenario1,scenario3) | 0.966   | 0.978    | 0.985     | 0.971               | 0.969                 | 0.960   | 0.956       | 0.970       |
|                               | Corr(scenario2,scenario3) | 0.929   | 0.937    | 0.958     | 0.933               | 0.925                 | 0.886   | 0.943       | 0.937       |
| Memory                        |                           |         |          |           |                     |                       |         |             |             |
|                               | Corr(scenario1,scenario2) | 0.943   | 0.988    | 0.990     | 0.992               | 0.993                 | 0.992   | 0.990       | 0.994       |
|                               | Corr(scenario1,scenario3) | 0.925   | 0.984    | 0.984     | 0.991               | 0.986                 | 0.994   | 0.975       | 0.991       |
|                               | Corr(scenario2,scenario3) | 0.960   | 0.973    | 0.972     | 0.991               | 0.984                 | 0.997   | 0.988       | 0.990       |
| Executive functioning         |                           |         |          |           |                     |                       |         |             |             |
|                               | Corr(scenario1,scenario2) | 0.856   | 0.995    | 0.982     | 0.985               | 0.988                 | 0.970   | 0.944       | 0.988       |
|                               | Corr(scenario1,scenario3) | 0.824   | 1.000    | 0.964     | 0.867               | 0.888                 | 0.955   | 0.896       | 0.969       |
|                               | Corr(scenario2,scenario3) | 0.800   | 0.995    | 0.989     | 0.863               | 0.902                 | 0.944   | 0.942       | 0.973       |
| Language                      |                           |         |          |           |                     |                       |         |             |             |
|                               | Corr(scenario1,scenario2) | 0.937   | 0.938    | 0.959     | 0.904               | 0.918                 | 0.936   | 0.942       | 0.963       |
|                               | Corr(scenario1,scenario3) | 0.947   | 0.967    | 0.986     | 0.930               | 0.925                 | 0.956   | 0.918       | 0.979       |
|                               | Corr(scenario2,scenario3) | 0.958   | 0.965    | 0.984     | 0.899               | 0.979                 | 0.946   | 0.967       | 0.978       |

With respect to correlations among domain-specific factors, most study-specific correlations among the scores from different ordering scenarios were  $r>0.95$  or higher; correlations were uniformly highest ( $r>0.97$ ) for the memory which had the richest set of cognitive test indicators across studies, defined by polytomous items and linking items between studies. Language was similarly highly correlated across the ordering scenarios. Correlations among ordering scenarios for orientation were as low as  $r=0.88$  in Mex-Cog between scenario 2 and others, but otherwise the average correlation among study-specific correlations for orientation was  $r=0.95$ . Correlations among ordering

scenarios for executive function were as low as  $r=0.86$  in LASI-DAD, but otherwise the average correlation among study-specific correlations for executive functioning was  $r=0.95$ . In the Table below, we highlighted in yellow the lowest correlations observed by domain.

The following table shows study-specific means and standard deviations of the general cognitive factor; we do not show specific domains because they all follow the same general patterns as for the general cognitive factor. Highlighted in yellow in each column is the study that appeared first in the item banking procedure.

| Study number | HCAP study            | Means by scenario |           |           | SD by scenario |           |           |
|--------------|-----------------------|-------------------|-----------|-----------|----------------|-----------|-----------|
|              |                       | Scenario1         | Scenario2 | Scenario3 | Scenario1      | Scenario2 | Scenario3 |
| 1            | HRS-HCAP              | -0.003            | 2.141     | 1.059     | 1.004          | 1.244     | 1.028     |
| 2            | ELSA-HCAP             | 0.003             | 2.266     | 1.125     | 1.073          | 1.351     | 1.098     |
| 4            | LASI-DAD (literate)   | -0.770            | 1.659     | 0.361     | 0.779          | 1.131     | 0.919     |
| 6            | LASI-DAD (illiterate) | -1.853            | -0.009    | -0.965    | 0.615          | 0.950     | 0.745     |
| 3            | Mex-Cog               | -0.840            | 1.386     | 0.177     | 0.993          | 1.433     | 1.090     |
| 9            | CHARLS-HCAP           | -1.188            | 0.410     | -0.084    | 0.983          | 1.091     | 0.934     |
| 5            | HAALSI-HCAP           | -1.283            | 0.883     | -0.163    | 0.771          | 1.167     | 0.995     |

We can glean 4 inferences from this table.

1. First, by design, the mean of the estimated factor score is close to 0 and the SD is close to 1 in the first study in the given ordering scenario (e.g., CHARLS-HCAP was the first study in ordering scenario 3, thus it's mean of -0.084 is closer to 0 than any other study for that ordering scenario). This result is by design because the latent trait mean (SD) is set to 0 (1) in the first study; this is what helps us interpret deviation differences in scores.
  - a. Because of differences between a latent variable in latent variable space and an observed factor score estimated in real data, we do not expect factor scores themselves to have a mean of exactly 0 and a standard deviation of 1.0. Usually, the standard deviation of an estimated factor score is less than 1.0 because of the lack of extreme outliers beyond -4 or +4 SD units in real data.
2. A second inference we can make is that, because the scores in different ordering scenarios are scaled to the first HCAP, a point shift means something different across different scenarios. This happens because different HCAPs have differing variances of cognitive function. Looking at the column of standard deviations, the SD for general cognition in ELSA-HCAP is greater than in HAALSI-HCAP, regardless of whether  $1.073 > 0.771$  (scenario 1),  $1.351 > 1.167$  (scenario 2), or  $1.098 > 0.995$  (scenario 3).
3. The third inference, notwithstanding the above caveat of inference 2, is that between ordering scenarios 1 and 2, there is a fairly constant mean upshift in scores of between 2.1-2.4 points. Two exceptions that have a relatively attenuated upshift are: LASI-DAD illiterates (upshift of just 1.84 points) and CHARLS-HCAP (upshift of just 1.60 points). Between ordering scenarios 1 and 3, there is a constant mean upshift in scores of between 1.0-1.1 points; the exception was among LASI-DAD illiterates (upshift 0.89).
4. A fourth inference we make is that, because of the lesser upshift in mean scores of certain studies between ordering scenarios, the relative ranking of country means across ordering scenarios varies slightly. Using study numbers in the above table:
  - Under ordering scenario 1, the ordering of means is  $6 < 5 = 9 < 3 < 4 < 1 = 2$ .
  - Under ordering scenario 2, the ordering of means is  $6 < 9 < 5 < 3 < 4 < 2 > 1$ .
  - Under ordering scenario 3, the ordering of means is  $6 < 5 = 9 < 3 < 4 < 1 = 2$ .

Ultimately, based on evidence from patterns in correlations among the different ordering scenarios, coupled with comparisons of means across the different scenarios, we conclude that the order of studies in the item bank should not affect the validity or reliability of resulting scores. The interpretation of a unit change does depend on the reference group, to the extent that different groups are different in variability of the underlying latent trait.

A caveat to the empirical conclusion regarding ordering of studies is that ordering of studies may be constrained based on availability of linking items. For example, in the following hypothetical scenario, studies A and C have no linking items and thus cannot be co-calibrated without study B. Study B cannot be added last. Acceptable ordering could be ABC, BAC, BCA, CBA. Unacceptable orders for the item banking procedure would be ACB, CAB.

| Indicator | Hypothetical study |         |         |
|-----------|--------------------|---------|---------|
|           | A                  | B       | C       |
| Item 1    | Present            |         |         |
| Item 2    | Present            |         |         |
| Item 3    | Present            | Present |         |
| Item 4    |                    | Present | Present |
| Item 5    |                    | Present | Present |
| Item 6    |                    |         | Present |

**Supplementary Table 3. Information about HCAP studies**

| Characteristic                                    | United States                                                                              | England                                                                                                                             | India                                                                                             | Mexico                                                                                                               | China                                                                                                         | South Africa                                                                                                                      |
|---------------------------------------------------|--------------------------------------------------------------------------------------------|-------------------------------------------------------------------------------------------------------------------------------------|---------------------------------------------------------------------------------------------------|----------------------------------------------------------------------------------------------------------------------|---------------------------------------------------------------------------------------------------------------|-----------------------------------------------------------------------------------------------------------------------------------|
| Parent cohort study                               | Health and Retirement study (HRS)                                                          | English Longitudinal Study on Ageing (ELSA)                                                                                         | Longitudinal Aging Study in India (LASI)                                                          | Mexican Health and Aging Study (MHAS)                                                                                | China Health and Retirement Longitudinal Study (CHARLS)                                                       | Health and Aging in Africa: A Longitudinal Study of an INDEPTH Community in South Africa (HAALSI)                                 |
| HCAP sub-study                                    | Harmonized Cognitive Assessment Protocol Project of Health and Retirement study (HRS-HCAP) | Harmonised Cognitive Assessment Protocol Sub-study of the English Longitudinal Study of Ageing (ELSA-HCAP)                          | Harmonised Diagnostic Assessment of Dementia for the Longitudinal Aging Study in India (LASI-DAD) | Mexican Cognitive Aging Ancillary Study (Mex-Cog)                                                                    | Harmonized Cognitive Assessment Protocol for the China Health and Retirement Longitudinal Study (CHARLS-HCAP) | Cognition and dementia in the Health and Aging in Africa Longitudinal Study of an INDEPTH community in South Africa (HAALSI-HCAP) |
| Dates of study recruitment                        | June 2016 – October 2017                                                                   | January 2018 – April 2018                                                                                                           | October 2017 – June 2018, October 2018 – May 2019                                                 | October 2015 – December 2015                                                                                         | July 12, 2017 – August 31, 2017                                                                               | September 9, 2019 – January 13, 2020                                                                                              |
| Eligibility criteria for HCAPs                    | 1. Aged 65 years and over at the time of HRS-HCAP survey<br>2. Completed core interview    | 1. Aged 65 years and over at the time of ELSA-HCAP survey<br>2. Completed an ELSA interview in wave 7 (2014-15) or wave 8 (2016-17) | 1. Aged 60 years and over at the time of LASI-DAD survey                                          | 1. Aged 55 and over in the MHAS 2015<br>2. Completed a direct or proxy interview for health reasons in the MHAS 2015 | 1. Aged 60 and over at the time of CHARLS-HCAP                                                                | 1. Aged 50 and over                                                                                                               |
| Number of target cases to conduct HCAP interviews | 4,425                                                                                      | 1,778                                                                                                                               | 3,891                                                                                             | 3,250                                                                                                                | Not reported                                                                                                  | Not reported                                                                                                                      |
| Number of completed HCAP interviews               | 3,496                                                                                      | 1,273                                                                                                                               | 4,096                                                                                             | 2,042                                                                                                                | 9,755                                                                                                         | 628                                                                                                                               |
| Language used during interviews                   |                                                                                            |                                                                                                                                     |                                                                                                   |                                                                                                                      |                                                                                                               |                                                                                                                                   |
| English                                           | 3174                                                                                       | 1273                                                                                                                                | 10                                                                                                |                                                                                                                      |                                                                                                               |                                                                                                                                   |
| Spanish                                           | 170                                                                                        |                                                                                                                                     |                                                                                                   | 2042                                                                                                                 |                                                                                                               |                                                                                                                                   |
| Mandarin                                          |                                                                                            |                                                                                                                                     |                                                                                                   |                                                                                                                      | 9755                                                                                                          |                                                                                                                                   |
| Hindi                                             |                                                                                            |                                                                                                                                     | 1,393                                                                                             |                                                                                                                      |                                                                                                               |                                                                                                                                   |
| Kannada                                           |                                                                                            |                                                                                                                                     | 245                                                                                               |                                                                                                                      |                                                                                                               |                                                                                                                                   |
| Malayalam                                         |                                                                                            |                                                                                                                                     | 349                                                                                               |                                                                                                                      |                                                                                                               |                                                                                                                                   |
| Gujarati                                          |                                                                                            |                                                                                                                                     | 288                                                                                               |                                                                                                                      |                                                                                                               |                                                                                                                                   |
| Tamil                                             |                                                                                            |                                                                                                                                     | 301                                                                                               |                                                                                                                      |                                                                                                               |                                                                                                                                   |
| Punjabi                                           |                                                                                            |                                                                                                                                     | 159                                                                                               |                                                                                                                      |                                                                                                               |                                                                                                                                   |

|          |     |
|----------|-----|
| Urdu     | 152 |
| Bengali  | 309 |
| Assamese | 199 |
| Odiya    | 252 |
| Marathi  | 250 |
| Telugu   | 189 |
| xiTsonga |     |

631

---



**Supplementary Table 4. Factor loadings of cognitive test items and item overlap across studies: Results from HCAP studies (N=21,144)**

| Variable                                      | HRS-HCAP    | ELSA-HCAP   | LASI-DAD<br>(literate) | LASI-DAD<br>(illiterate) | Mex-Cog     | CHARLS-<br>HCAP | HAALSI-<br>HCAP |
|-----------------------------------------------|-------------|-------------|------------------------|--------------------------|-------------|-----------------|-----------------|
| <b>Orientation</b>                            |             |             |                        |                          |             |                 |                 |
| Day of month                                  | 0.68 (0.43) | 0.68 (0.43) | 0.68 (0.43)            | 0.68 (0.43)              | 0.68 (0.43) | 0.68 (0.43)     | 0.68 (0.43)     |
| Month                                         | 0.88 (0.73) | 0.88 (0.73) | 0.88 (0.73)            | 0.88 (0.73)              | 0.88 (0.73) | 0.88 (0.73)     | 0.88 (0.73)     |
| Year                                          | 0.90 (0.76) | 0.90 (0.76) |                        |                          | 0.90 (0.76) | 0.90 (0.76)     |                 |
| Year (DIF adjusted)                           |             |             | 0.70 (0.82)            | 0.70 (0.82)              |             |                 | 0.70 (0.82)     |
| Day of the week                               | 0.76 (0.63) | 0.76 (0.63) | 0.76 (0.63)            | 0.76 (0.63)              | 0.76 (0.63) | 0.76 (0.63)     | 0.76 (0.63)     |
| What time is it                               |             |             |                        |                          | 0.17 (0.32) |                 | 0.17 (0.32)     |
| Where are we                                  |             |             |                        |                          | 0.13 (0.35) |                 |                 |
| What country are we in                        |             | 0.62 (0.72) |                        |                          | 0.62 (0.72) |                 | 0.62 (0.72)     |
| What state are we in                          | 0.64 (0.61) |             | 0.64 (0.61)            | 0.64 (0.61)              | 0.64 (0.61) | 0.64 (0.61)     | 0.64 (0.61)     |
| What county are we in                         | 0.68 (0.55) | 0.68 (0.55) |                        |                          |             | 0.68 (0.55)     |                 |
| What city are we in                           | 0.83 (0.72) | 0.83 (0.72) | 0.83 (0.72)            | 0.83 (0.72)              |             | 0.83 (0.72)     | 0.83 (0.72)     |
| Season of year                                | 0.54 (0.42) | 0.54 (0.42) | 0.54 (0.42)            | 0.54 (0.42)              |             | 0.54 (0.42)     | 0.54 (0.42)     |
| Floor of building                             | 0.66 (0.56) |             | 0.66 (0.56)            | 0.66 (0.56)              |             | 0.66 (0.56)     | 0.66 (0.56)     |
| Address (street name and/or building number)  | 0.76 (0.62) | 0.76 (0.62) | 0.76 (0.62)            | 0.76 (0.62)              |             | 0.76 (0.62)     |                 |
| Name of hospital or district/municipality     |             |             | 0.63 (0.69)            | 0.63 (0.69)              |             |                 | 0.63 (0.69)     |
| <b>Memory</b>                                 |             |             |                        |                          |             |                 |                 |
| CERAD immediate sum of 3 trials               | 0.87 (0.82) | 0.87 (0.82) |                        |                          |             | 0.87 (0.82)     |                 |
| CERAD immediate sum of 3 trials               |             |             | 0.89 (0.69)            | 0.89 (0.69)              | 0.89 (0.69) |                 | 0.89 (0.69)     |
| CERAD word list delay                         | 0.88 (0.85) | 0.88 (0.85) |                        |                          |             | 0.88 (0.85)     |                 |
| CERAD word list delay                         |             |             | 0.88 (0.65)            | 0.88 (0.65)              | 0.88 (0.65) |                 | 0.88 (0.65)     |
| CERAD recognition                             | 0.75 (0.58) | 0.75 (0.58) |                        |                          |             | 0.75 (0.58)     |                 |
| CERAD recognition                             |             |             | 0.79 (0.65)            | 0.79 (0.65)              | 0.79 (0.65) |                 | 0.79 (0.65)     |
| Three word immediate registration             | 0.51 (0.49) | 0.51 (0.49) | 0.51 (0.49)            | 0.51 (0.49)              | 0.51 (0.49) | 0.51 (0.49)     | 0.51 (0.49)     |
| Three word delayed recall                     | 0.76 (0.65) | 0.76 (0.65) | 0.76 (0.65)            | 0.76 (0.65)              | 0.76 (0.65) | 0.76 (0.65)     | 0.76 (0.65)     |
| Logical Memory immediate                      | 0.71 (0.65) | 0.71 (0.65) | 0.71 (0.65)            | 0.71 (0.65)              | 0.71 (0.65) |                 | 0.71 (0.65)     |
| Logical Memory delay                          | 0.74 (0.67) | 0.74 (0.67) | 0.74 (0.67)            | 0.74 (0.67)              | 0.74 (0.67) |                 | 0.74 (0.67)     |
| Logical memory recognition                    | 0.62 (0.52) | 0.62 (0.52) | 0.62 (0.52)            | 0.62 (0.52)              |             |                 | 0.62 (0.52)     |
| Brave man immediate (East Boston Memory Test) | 0.42 (0.39) | 0.42 (0.39) | 0.42 (0.39)            | 0.42 (0.39)              | 0.42 (0.39) |                 |                 |
| Brave man delay (East Boston Memory Test)     | 0.53 (0.43) | 0.53 (0.43) | 0.53 (0.43)            | 0.53 (0.43)              | 0.53 (0.43) |                 |                 |
| CERAD constructional praxis delay             | 0.70 (0.67) | 0.70 (0.67) | 0.70 (0.67)            | 0.70 (0.67)              | 0.70 (0.67) |                 | 0.70 (0.67)     |
| <b>Executive functioning</b>                  |             |             |                        |                          |             |                 |                 |
| Problem solving                               |             |             | 0.75 (0.71)            | 0.75 (0.71)              |             |                 |                 |

|                                        |             |             |             |             |             |             |             |
|----------------------------------------|-------------|-------------|-------------|-------------|-------------|-------------|-------------|
| Ravens progressive matrices            | 0.74 (0.68) | 0.74 (0.68) | 0.74 (0.68) | 0.74 (0.68) |             |             | 0.74 (0.68) |
| HRS Number series                      | 0.64 (0.57) | 0.64 (0.57) |             |             |             |             |             |
| Number series                          |             |             |             |             |             | 0.56 (0.44) |             |
| Trails A time (letters and numbers)    | 0.79 (0.76) | 0.79 (0.76) |             |             |             |             |             |
| Trails B time (letters and numbers)    | 0.76 (0.67) | 0.76 (0.67) |             |             |             |             |             |
| Similarities                           |             |             | 0.58 (0.57) | 0.58 (0.57) | 0.58 (0.57) |             | 0.58 (0.57) |
| Token Test                             |             |             | 0.77 (0.75) | 0.77 (0.75) |             |             | 0.77 (0.75) |
| Digit Span Forward (single item)       |             |             | 0.68 (0.60) | 0.68 (0.60) |             |             |             |
| Digit Span Backward (single item)      |             |             | 0.73 (0.64) | 0.73 (0.64) |             |             |             |
| Digit Span Forward (multiple items)    |             |             |             |             |             |             | 0.48 (0.38) |
| Digit Span Backward (multiple items)   |             |             |             |             |             |             | 0.43 (0.28) |
| Go-No-Go                               |             |             | 0.71 (0.67) | 0.71 (0.67) | 0.71 (0.67) |             | 0.71 (0.67) |
| Motor Programming                      |             |             |             |             |             |             | 0.76 (0.74) |
| MMSE Spelling backwards                | 0.62 (0.65) |             |             |             |             |             |             |
| Backward counting, 100-0               | 0.69 (0.63) | 0.69 (0.63) |             |             |             |             |             |
| Backward counting, 20-0                |             |             |             |             | 0.54 (0.79) |             |             |
| Symbol Digit Modalities Test *         | 0.88 (0.77) | 0.88 (0.77) |             |             |             |             |             |
| Symbols and Digits test **             |             |             |             |             | 0.58 (0.77) |             |             |
| Symbol Cancellation Test               |             |             | 0.67 (0.68) | 0.67 (0.68) | 0.67 (0.68) |             | 0.67 (0.68) |
| Letter cancellation                    | 0.59 (0.57) | 0.59 (0.57) |             |             |             |             |             |
| Serial 3s                              |             |             |             |             | 0.36 (0.54) |             |             |
| Serial 7s                              |             | 0.56 (0.53) | 0.56 (0.53) | 0.56 (0.53) | 0.56 (0.53) | 0.56 (0.53) | 0.56 (0.53) |
| Backward Day naming                    |             |             | 0.68 (0.68) | 0.68 (0.68) |             |             | 0.68 (0.68) |
| Forward day naming                     |             |             |             |             |             |             | 0.74 (0.68) |
| CDR calculation-cent                   |             |             |             |             |             |             | 0.62 (0.69) |
| <b>Language</b>                        |             |             |             |             |             |             |             |
| Animal fluency                         | 0.74 (0.68) | 0.74 (0.68) | 0.74 (0.68) | 0.74 (0.68) | 0.74 (0.68) | 0.74 (0.68) | 0.74 (0.68) |
| Name a described cactus                | 0.81 (0.70) | 0.81 (0.70) |             |             |             |             |             |
| Name a described cactus (DIF adjusted) |             |             |             |             |             | 0.79 (0.60) |             |
| Name a described coconut               |             |             | 0.56 (0.45) | 0.56 (0.45) |             |             |             |
| What are scissors used for?            | 0.71 (0.54) | 0.71 (0.54) | 0.71 (0.54) | 0.71 (0.54) | 0.71 (0.54) | 0.71 (0.54) | 0.71 (0.54) |
| Object naming (watch)                  | 0.69 (0.59) |             | 0.69 (0.59) | 0.69 (0.59) | 0.69 (0.59) | 0.69 (0.59) | 0.69 (0.59) |
| Object naming (pencil)                 | 0.56 (0.57) |             | 0.56 (0.57) | 0.56 (0.57) | 0.56 (0.57) | 0.56 (0.57) | 0.56 (0.57) |
| Name the elbow                         | 0.88 (0.68) | 0.88 (0.68) | 0.88 (0.68) | 0.88 (0.68) | 0.88 (0.68) | 0.88 (0.68) | 0.88 (0.68) |
| Write a sentence (or write one's name) | 0.62 (0.52) | 0.62 (0.52) | 0.62 (0.52) |             | 0.62 (0.52) | 0.62 (0.52) | 0.62 (0.52) |
| Say a sentence                         |             |             |             | 0.81 (0.67) |             |             |             |

|                                           |             |             |             |             |             |             |             |
|-------------------------------------------|-------------|-------------|-------------|-------------|-------------|-------------|-------------|
| Read and follow command (Close your eyes) | 0.61 (0.46) | 0.61 (0.46) | 0.61 (0.46) |             | 0.61 (0.46) |             | 0.61 (0.46) |
| Read and follow command (DIF adjusted)    |             |             |             |             |             | 0.73 (0.58) |             |
| Follow example (close your eyes)          |             |             |             | 0.86 (0.71) |             |             |             |
| Repetition of a phrase                    | 0.46 (0.37) | 0.46 (0.37) | 0.46 (0.37) | 0.46 (0.37) | 0.46 (0.37) | 0.46 (0.37) | 0.46 (0.37) |
| What does one do with a hammer            | 0.43 (0.24) | 0.43 (0.24) | 0.43 (0.24) | 0.43 (0.24) | 0.43 (0.24) | 0.43 (0.24) | 0.43 (0.24) |
| Define Bridge                             |             |             |             |             | 0.62 (0.54) |             |             |
| Point to 2 things in the vicinity         | 0.85 (0.65) | 0.85 (0.65) | 0.85 (0.65) | 0.85 (0.65) | 0.85 (0.65) | 0.85 (0.65) | 0.85 (0.65) |
| Where is the local market?                | 0.58 (0.48) | 0.58 (0.48) | 0.58 (0.48) | 0.58 (0.48) | 0.58 (0.48) | 0.58 (0.48) | 0.58 (0.48) |
| Follow 3-stage instruction                | 0.39 (0.30) | 0.39 (0.30) | 0.39 (0.30) | 0.39 (0.30) | 0.39 (0.30) |             | 0.39 (0.30) |
| Name president or Prime Minister          | 0.85 (0.82) | 0.85 (0.82) | 0.85 (0.82) | 0.85 (0.82) |             | 0.85 (0.82) | 0.85 (0.82) |
| Name deputy president                     |             |             |             |             |             |             | 0.87 (0.75) |
| Phonemic Fluency                          |             |             |             |             |             |             | 0.59 (0.63) |
| Boston Naming Test, uncued                |             |             |             |             |             |             | 0.68 (0.62) |

Legend. This table shows factor loadings for domain-specific factor analyses, and in parentheses the factor loadings for the model for general cognitive function. Loadings are standardized to have a range from -1 to 1, thus can be interpretable as correlations between items and the underlying factor. The presence of factor loadings for a given test item in each column reflects decisions about the comparability of items made at the prestatistical harmonization as well as after testing for differential item functioning. Refer to the Methods and Results for details.

\* (110 items, correctly assign numbers to symbols provided on the test's page based on a key)

\*\* (56 items, correctly assign symbols provided on the test's page based on a key)

1 **Supplementary Table 5. Crosswalk between scaled educational attainment equivalents based on ISCED 2011 and education categories in each study**

| ISCED attainment level             | HRS-HCAP                                                                                               | ELSA-HCAP                                                                                                                                                                                                        | LASI-DAD                                                                                                                                                                            | Mex-Cog               | CHARLS-HCAP                                                                                                                                                   | HAALSI-HCAP                                                                              |
|------------------------------------|--------------------------------------------------------------------------------------------------------|------------------------------------------------------------------------------------------------------------------------------------------------------------------------------------------------------------------|-------------------------------------------------------------------------------------------------------------------------------------------------------------------------------------|-----------------------|---------------------------------------------------------------------------------------------------------------------------------------------------------------|------------------------------------------------------------------------------------------|
| 0: No or Early Childhood education | No degree                                                                                              | No formal education                                                                                                                                                                                              | (1) 0 year of schooling<br>(2) Less than primary school (Standard 1-4)                                                                                                              | 0-5 years of school   | (1) No formal education (illiterate)<br>(2) Did not finish primary school                                                                                     | (1) No formal education; (2) Preschool                                                   |
| 1: Primary education               | Grades 1-6                                                                                             | Not available from ELSA data                                                                                                                                                                                     | Primary school completed (Standard 5-7)                                                                                                                                             | 6 years of school     | (1) Sishu/home school<br>(2) Elementary school                                                                                                                | Grades 1-6 (Sub-A through Std 4)                                                         |
| 2: Lower secondary education       | Grades 7-12                                                                                            | No qualification; Foreign/undetermined qualification, if age at which continuous full-time education finished is ≤ 16 years                                                                                      | Middle school completed (Standard 8- 9)                                                                                                                                             | 7-9 years of school   | Middle school                                                                                                                                                 | Grades 7-9 (Std 4-7)                                                                     |
| 3: Upper secondary education       | GED/high school diploma                                                                                | (1) NVQ1/CSE or other grade equivalent<br>(2) NVQ2/GCE O level equivalent<br>(3) Foreign/undetermined qualification, if age at which continuous full-time education finished is 17 and 18 years                  | (1) Secondary school/Matriculation completed<br>(2) Higher secondary/intermediate/senior secondary completed                                                                        | 10-12 years of school | High School                                                                                                                                                   | Grades 10-12 (Std 8-10)                                                                  |
| 4-8: Post-secondary education      | (1) Some college;<br>(2) Masters degree;<br>(3) Professional degree; (4) Grades > 12 if degree unknown | (1) NVQ3/GCE A level equivalent; (2) Higher education below degree; (3) NVQ4/NVQ5/degree or equivalent; (4) Foreign/undetermined qualification if age at which full-time education finished is 19 years or older | (1) Diploma or certificate; (2) Graduate degree (B.A., B.Sc., B. Com.); (3) Post-graduate degree or (M.A., M.Sc., M. Com., M.Phil, Ph.D., Post-Doc); (4) Professional course/degree | 13+ years of school   | (1) Vocational school<br>(2) Two/three year college/associate degree<br>(3) Four year college/Bachelors' degree<br>(4) Master's degree<br>(5) Doctoral degree | (1) Partial or complete tertiary education; (2) partial or complete University education |

2  
3  
4

5 **Supplementary Table 6. Estimated thresholds and intercepts of cognitive test items: Results from HCAP studies (N=21,144)**

| Cognitive test item                          | Is the item categorical or continuous | Intercept (continuous items) | Threshold (categorical items) |               |               |   |   |   |   |   |   |
|----------------------------------------------|---------------------------------------|------------------------------|-------------------------------|---------------|---------------|---|---|---|---|---|---|
|                                              |                                       |                              | 1                             | 2             | 3             | 4 | 5 | 6 | 7 | 8 | 9 |
| <b>Orientation</b>                           |                                       |                              |                               |               |               |   |   |   |   |   |   |
| Day of month                                 | Categorical                           |                              | -1.29 (-1.01)                 |               |               |   |   |   |   |   |   |
| Month                                        | Categorical                           |                              | -4.28 (-2.87)                 |               |               |   |   |   |   |   |   |
| Year                                         | Categorical                           |                              | -3.85 (-2.81)                 |               |               |   |   |   |   |   |   |
| Year (DIF adjusted)                          | Categorical                           |                              | -1.49 (-2.44)                 |               |               |   |   |   |   |   |   |
| Day of the week                              | Categorical                           |                              | -2.51 (-2.26)                 |               |               |   |   |   |   |   |   |
| What time is it                              | Categorical                           |                              | -0.68 (-0.85)                 |               |               |   |   |   |   |   |   |
| Where are we                                 | Categorical                           |                              | -1.19 (-1.47)                 |               |               |   |   |   |   |   |   |
| What country are we in                       | Categorical                           |                              | -3.36 (-3.75)                 |               |               |   |   |   |   |   |   |
| What state are we in                         | Categorical                           |                              | -2.92 (-3.02)                 |               |               |   |   |   |   |   |   |
| What county are we in                        | Categorical                           |                              | -2.11 (-1.95)                 |               |               |   |   |   |   |   |   |
| What city are we in                          | Categorical                           |                              | -3.76 (-3.30)                 |               |               |   |   |   |   |   |   |
| Season of year                               | Categorical                           |                              | -1.33 (-1.27)                 |               |               |   |   |   |   |   |   |
| Floor of building                            | Categorical                           |                              | -2.65 (-2.51)                 |               |               |   |   |   |   |   |   |
| Address (street name and/or building number) | Categorical                           |                              | -2.54 (-2.25)                 |               |               |   |   |   |   |   |   |
| Name of hospital or district/municipality    | Categorical                           |                              | -2.04 (-2.51)                 |               |               |   |   |   |   |   |   |
| <b>Memory</b>                                |                                       |                              |                               |               |               |   |   |   |   |   |   |
| CERAD immediate sum of 3 trials              | Continuous                            | 17.40 (17.40)                |                               |               |               |   |   |   |   |   |   |
| CERAD immediate sum of 3 trials              | Continuous                            | 17.29 (16.64)                |                               |               |               |   |   |   |   |   |   |
| CERAD word list delay                        | Continuous                            | 5.12 (5.12)                  |                               |               |               |   |   |   |   |   |   |
| CERAD word list delay                        | Continuous                            | 5.64 (5.25)                  |                               |               |               |   |   |   |   |   |   |
| CERAD recognition                            | Continuous                            | 18.49 (18.49)                |                               |               |               |   |   |   |   |   |   |
| CERAD recognition                            | Continuous                            | 19.17 (19.02)                |                               |               |               |   |   |   |   |   |   |
| Three word immediate registration            | Categorical                           |                              | -2.37 (-2.47)                 | -1.51 (-1.57) |               |   |   |   |   |   |   |
| Three word delayed recall                    | Categorical                           |                              | -2.67 (-2.55)                 | -1.87 (-1.78) | -0.64 (-0.61) |   |   |   |   |   |   |
| Logical Memory immediate                     | Continuous                            | 9.83 (9.83)                  |                               |               |               |   |   |   |   |   |   |
| Logical Memory delay                         | Continuous                            | 7.39 (7.39)                  |                               |               |               |   |   |   |   |   |   |
| Logical memory recognition                   | Continuous                            | 10.28 (10.28)                |                               |               |               |   |   |   |   |   |   |

|                                               |             |               |               |               |               |               |               |               |               |               |               |
|-----------------------------------------------|-------------|---------------|---------------|---------------|---------------|---------------|---------------|---------------|---------------|---------------|---------------|
| Brave man immediate (East Boston Memory Test) | Categorical |               | -2.61 (-2.66) | -1.36 (-1.38) | -0.16 (-0.17) | 0.90 (0.92)   | 2.03 (2.07)   | 3.28 (3.34)   |               |               |               |
| Brave man delay (East Boston Memory Test)     | Categorical |               | -0.96 (-0.92) | -0.09 (-0.09) | 0.82 (0.79)   | 1.85 (1.78)   | 3.23 (3.11)   | 4.41 (4.24)   |               |               |               |
| CERAD constructional praxis delay             | Continuous  | 5.81 (5.81)   |               |               |               |               |               |               |               |               |               |
| <b>Executive functioning</b>                  |             |               |               |               |               |               |               |               |               |               |               |
| Problem solving                               | Categorical |               | -3.35 (-3.40) | -2.03 (-2.11) | -0.73 (-0.84) |               |               |               |               |               |               |
| Ravens progressive matrices                   | Continuous  | 12.34 (12.34) |               |               |               |               |               |               |               |               |               |
| HRS Number series                             | Continuous  | -0.06 (-0.06) |               |               |               |               |               |               |               |               |               |
| Number series                                 | Continuous  | 7.04 (9.12)   |               |               |               |               |               |               |               |               |               |
| Trails A time (letters and numbers)           | Continuous  | 0.06 (0.06)   |               |               |               |               |               |               |               |               |               |
| Trails B time (letters and numbers)           | Continuous  | 0.01 (0.01)   |               |               |               |               |               |               |               |               |               |
| Similarities                                  | Categorical |               | -2.06 (-2.20) | -0.98 (-1.11) | -0.05 (-0.17) |               |               |               |               |               |               |
| Token Test                                    | Categorical |               | -3.99 (-4.16) | -3.46 (-3.63) | -3.06 (-3.23) | -2.27 (-2.45) | -1.53 (-1.71) | -0.80 (-0.97) | 0.01 (-0.16)  |               |               |
| Digit Span Forward (single item)              | Categorical |               | -0.46 (-0.51) |               |               |               |               |               |               |               |               |
| Digit Span Backward (single item)             | Categorical |               | -0.81 (-0.81) |               |               |               |               |               |               |               |               |
| Digit Span Forward (multiple items)           | Categorical |               | -1.51 (-1.34) | -0.30 (-0.17) | 0.82 (0.92)   |               |               |               |               |               |               |
| Digit Span Backward (multiple items)          | Categorical |               | -0.69 (-0.48) | 0.36 (0.52)   | 1.25 (1.38)   |               |               |               |               |               |               |
| Go-No-Go                                      | Categorical |               | -2.69 (-2.77) | -2.49 (-2.57) | -2.36 (-2.45) | -2.17 (-2.26) | -1.89 (-1.99) | -1.71 (-1.80) | -1.48 (-1.58) | -1.19 (-1.30) | -0.79 (-0.90) |
| Motor Programming                             | Categorical |               | -4.01 (-3.93) | -3.81 (-3.75) | -3.48 (-3.42) | -3.08 (-3.03) | -2.39 (-2.35) | -1.65 (-1.64) |               |               |               |
| MMSE Spelling backwards                       | Categorical |               | -3.28 (-2.07) | -2.90 (-1.82) | -2.36 (-1.49) | -1.54 (-0.97) | -1.24 (-0.78) |               |               |               |               |
| Backward counting, 100-0                      | Continuous  | 29.27 (29.27) |               |               |               |               |               |               |               |               |               |
| Backward counting, 20-0                       | Categorical |               | -2.04 (-2.84) | -1.93 (-2.73) | -1.71 (-2.51) | -0.80 (-1.58) |               |               |               |               |               |
| Symbol Digit Modalities Test *                | Continuous  | 31.81 (31.81) |               |               |               |               |               |               |               |               |               |
| Symbols and Digits test **                    | Continuous  | 25.48 (31.50) |               |               |               |               |               |               |               |               |               |
| Symbol Cancellation Test                      | Continuous  | 16.39 (17.68) |               |               |               |               |               |               |               |               |               |
| Letter cancellation                           | Continuous  | 9.69 (9.69)   |               |               |               |               |               |               |               |               |               |
| Serial 3s                                     | Categorical |               | -2.28 (-2.53) | -1.64 (-1.92) | -1.28 (-1.58) | -0.80 (-1.12) | 0.13 (-0.23)  |               |               |               |               |

|                                           |             |               |               |               |               |               |               |
|-------------------------------------------|-------------|---------------|---------------|---------------|---------------|---------------|---------------|
| Serial 7s                                 | Categorical |               | -1.49 (-1.41) | -0.44 (-0.37) | -0.22 (-0.15) | -0.02 (0.05)  | 0.15 (0.23)   |
| Backward Day naming                       | Categorical |               | -2.46 (-2.70) | -2.34 (-2.57) | -2.19 (-2.42) | -2.08 (-2.31) | -1.70 (-1.92) |
| Forward day naming                        | Categorical |               | -2.81 (-2.60) |               |               |               |               |
| CDR calculation-cent                      | Categorical |               | -0.13 (-0.36) |               |               |               |               |
| <b>Language</b>                           |             |               |               |               |               |               |               |
| Animal fluency                            | Continuous  | 15.97 (15.97) |               |               |               |               |               |
| Name a described cactus                   | Categorical |               | -2.26 (-2.06) |               |               |               |               |
| Name a described cactus (DIF adjusted)    | Categorical |               | -0.55 (0.21)  |               |               |               |               |
| Name a described coconut                  | Categorical |               | -1.25 (-0.96) |               |               |               |               |
| What are scissors used for?               | Categorical |               | -3.01 (-2.58) |               |               |               |               |
| Object naming (watch)                     | Categorical |               | -4.20 (-3.33) |               |               |               |               |
| Object naming (pencil)                    | Categorical |               | -3.31 (-3.09) |               |               |               |               |
| Name the elbow                            | Categorical |               | -4.50 (-3.21) |               |               |               |               |
| Write a sentence (or write one's name)    | Categorical |               | -1.84 (-1.80) |               |               |               |               |
| Say a sentence                            | Categorical |               | -3.12 (-2.96) |               |               |               |               |
| Read and follow command (Close your eyes) | Categorical |               | -2.36 (-2.21) |               |               |               |               |
| Read and follow command (DIF adjusted)    | Categorical |               | -2.48 (-1.76) |               |               |               |               |
| Follow example (close your eyes)          | Categorical |               | -3.56 (-3.21) |               |               |               |               |
| Repetition of a phrase                    | Categorical |               | -0.59 (-0.58) |               |               |               |               |
| What does one do with a hammer            | Categorical |               | -1.57 (-1.49) |               |               |               |               |
| Define Bridge                             | Categorical |               | -1.39 (-1.56) |               |               |               |               |
| Point to 2 things in the vicinity         | Categorical |               | -4.05 (-3.13) |               |               |               |               |
| Where is the local market?                | Categorical |               | -1.05 (-1.03) |               |               |               |               |
| Follow 3-stage instruction                | Categorical |               | -2.80 (-2.76) | -2.03 (-2.00) | -0.67 (-0.66) |               |               |
| Name president or Prime Minister          | Categorical |               | -2.85 (-2.99) |               |               |               |               |
| Name deputy president                     | Categorical |               | -0.98 (-0.75) |               |               |               |               |
| Phonemic Fluency                          | Continuous  | 3.86 (4.37)   |               |               |               |               |               |
| Boston Naming Test, uncued                | Continuous  | 15.21 (15.35) |               |               |               |               |               |

6 Legend. Intercepts and thresholds were estimated from factor analysis models using a maximum likelihood estimator with a probit link. For each item,  
7 parameters from domain-specific factor analyses are shown, and in parentheses is the corresponding parameter for the model for general cognitive function.

8 **Supplementary Table 7. Results of differential item functioning among confident and tentative linking items for the language domain: Results from**  
 9 **HCAP studies (N=21,144)**

| Study              | Stage of DIF testing | Cognitive test item                                                    | Association with cohort (REF: HRS-HCAP)a | 95% CI lower bound | 95% CI upper bound | Interpretation (b) |
|--------------------|----------------------|------------------------------------------------------------------------|------------------------------------------|--------------------|--------------------|--------------------|
| <b>HAALSI-HCAP</b> |                      |                                                                        |                                          |                    |                    |                    |
|                    |                      | DIF among confident linking items                                      |                                          |                    |                    |                    |
|                    |                      | Name the elbow                                                         | 1.65                                     | 1.31               | 2.08               | DIF                |
|                    |                      | Animal fluency                                                         | N/A                                      |                    |                    | No DIF             |
|                    |                      | What are scissors used for?                                            | N/A                                      |                    |                    | No DIF             |
|                    |                      | Point to 2 things in the vicinity                                      | N/A                                      |                    |                    | No DIF             |
|                    |                      | Name president or Prime Minister                                       | N/A                                      |                    |                    | No DIF             |
|                    |                      | DIF among tentative linking items, treating confident items as anchors |                                          |                    |                    |                    |
|                    |                      | What does one do with a hammer                                         | 2.64                                     | 2.14               | 3.27               | DIF                |
|                    |                      | Where is the local market?                                             | 2.06                                     | 1.81               | 2.34               | DIF                |
| <b>ELSA-HCAP</b>   |                      |                                                                        |                                          |                    |                    |                    |
|                    |                      | DIF among confident linking items                                      |                                          |                    |                    |                    |
|                    |                      | Name a described cactus                                                | 0.61                                     | 0.55               | 0.67               | DIF                |
|                    |                      | What does one do with a hammer                                         | 2.29                                     | 1.86               | 2.82               | DIF                |
|                    |                      | Follow 3-stage instruction                                             | 1.83                                     | 1.66               | 2.03               | DIF                |
|                    |                      | Name president or Prime Minister                                       | 0.43                                     | 0.39               | 0.47               | DIF                |
|                    |                      | Animal fluency                                                         | N/A                                      |                    |                    | No DIF             |
|                    |                      | Point to 2 things in the vicinity                                      | N/A                                      |                    |                    | No DIF             |
|                    |                      | What are scissors used for?                                            | N/A                                      |                    |                    | No DIF             |
|                    |                      | Name the elbow                                                         | N/A                                      |                    |                    | No DIF             |
|                    |                      | Read and follow command (Close your eyes)                              | N/A                                      |                    |                    | No DIF             |
|                    |                      | Repetition of a phrase                                                 | N/A                                      |                    |                    | No DIF             |
|                    |                      | DIF among tentative linking items, treating confident items as anchors |                                          |                    |                    |                    |
|                    |                      | Where is the local market?                                             | 2.31                                     | 2.03               | 2.62               | DIF                |



|                                |                                                                        |      |      |        |            |
|--------------------------------|------------------------------------------------------------------------|------|------|--------|------------|
| LASI-DAD                       | Write a sentence (or write one's name)                                 | N/A  |      |        | No DIF     |
|                                | DIF among confident linking items                                      |      |      |        |            |
|                                | What are scissors used for?                                            | N/A  |      |        | No DIF     |
|                                | Object naming (pencil)                                                 | N/A  |      |        | No DIF     |
|                                | Write a sentence (or write one's name)                                 | 1.40 | 1.24 | 1.58   | Negligible |
|                                | Read and follow command (Close your eyes)                              | 0.14 | 0.13 | 0.16   | DIF        |
|                                | Follow 3-stage instruction                                             | 1.65 | 1.51 | 1.80   | DIF        |
|                                | Animal fluency                                                         | N/A  |      |        | No DIF     |
|                                | Object naming (watch)                                                  | N/A  |      |        | No DIF     |
|                                | Name the elbow                                                         | 1.13 | 0.96 | 1.32   | Negligible |
|                                | Point to 2 things in the vicinity                                      | N/A  |      |        | No DIF     |
|                                | Name president or Prime Minister                                       | N/A  |      |        | No DIF     |
|                                | DIF among tentative linking items, treating confident items as anchors |      |      |        |            |
|                                | Repetition of a phrase                                                 | 4.85 | 4.32 | 5.44   | DIF        |
| What does one do with a hammer | N/A                                                                    |      |      | No DIF |            |
| Where is the local market?     | 3.79                                                                   | 3.36 | 4.27 | DIF    |            |
| Mex-Cog                        | DIF among confident linking items                                      |      |      |        |            |
|                                | Animal fluency                                                         | N/A  |      |        | No DIF     |
|                                | Object naming (pencil)                                                 | N/A  |      |        | No DIF     |
|                                | Name the elbow                                                         | 1.03 | 0.87 | 1.21   | Negligible |
|                                | Read and follow command (Close your eyes)                              | N/A  |      |        | No DIF     |
|                                | Point to 2 things in the vicinity                                      | N/A  |      |        | No DIF     |
|                                | Follow 3-stage instruction                                             | N/A  |      |        | No DIF     |
|                                | DIF among tentative linking items, treating confident items as anchors |      |      |        |            |
|                                | What are scissors used for?                                            | 1.71 | 1.42 | 2.06   | DIF        |
|                                | Repetition of a phrase                                                 | 3.21 | 2.93 | 3.51   | DIF        |
| What does one do with a hammer | 2.08                                                                   | 1.83 | 2.37 | DIF    |            |
| Where is the local market?     | 0.48                                                                   | 0.45 | 0.52 | DIF    |            |
| Object naming (watch)          | N/A                                                                    |      |      | No DIF |            |

| CHARLS-HCAP | Write a sentence (or write one's name)                                 | N/A  |      |      | No DIF     |
|-------------|------------------------------------------------------------------------|------|------|------|------------|
|             | DIF among confident linking items                                      |      |      |      |            |
|             | Name the elbow                                                         | 0.44 | 0.39 | 0.50 | DIF        |
|             | Write a sentence (or write one's name)                                 | 0.53 | 0.48 | 0.58 | DIF        |
|             | What does one do with a hammer                                         | 2.32 | 2.12 | 2.54 | DIF        |
|             | Point to 2 things in the vicinity                                      | 0.43 | 0.37 | 0.49 | DIF        |
|             | Name president or Prime Minister                                       | 1.40 | 1.29 | 1.52 | Negligible |
|             | What are scissors used for?                                            | N/A  |      |      | No DIF     |
|             | Repetition of a phrase                                                 | N/A  |      |      | No DIF     |
|             | Animal fluency                                                         | N/A  |      |      | No DIF     |
|             | DIF among tentative linking items, treating confident items as anchors |      |      |      |            |
|             | Object naming (watch)                                                  | 0.59 | 0.49 | 0.70 | DIF        |
|             | Object naming (pencil)                                                 | N/A  |      |      | No DIF     |
|             | Read and follow command (Close your eyes)                              | 1.34 | 1.27 | 1.41 | Negligible |
|             | Where is the local market?                                             | 1.47 | 1.37 | 1.57 | Negligible |
|             | Name a described cactus                                                | 3.65 | 3.3  | 4.04 | DIF        |
|             | Follow 3-stage instruction                                             | N/A  |      |      | No DIF     |

10 Legend. Odds Ratios (OR) illustrate the difference (on an odds scale) in outcome between a given study and HRS-HCAP, adjusting for the latent ability. An  
11 OR greater than 1 implies better performance than expected on the item in the focal study, compared to HRS-HCAP, whereas an OR less than 1 indicates better  
12 performance on the item than expected in HRS-HCAP, compared to the focal study.

13 N/A =Not Applicable. This is shown when an item is present in a given study, but no DIF was detected; in these cases the "Interpretation" column notes "No  
14 DIF" was detected.

15 a Reference group is HRS-HCAP.

16 b Interpretation of the magnitude of DIF as negligible (between 0.66 and 1.5) or nonnegligible (DIF).

17

18

19

20 **Supplementary Table 8. Results of differential item functioning among confident and tentative linking items for the memory domain: Results from**  
 21 **HCAP studies (N=21,144)**

| Study              | Stage of DIF testing                                                   | Cognitive test item                           | Association with cohort (REF: HRS-HCAP) | 95% CI lower bound | 95% CI upper bound | Interpretation |
|--------------------|------------------------------------------------------------------------|-----------------------------------------------|-----------------------------------------|--------------------|--------------------|----------------|
| <b>HAALSI-HCAP</b> |                                                                        |                                               |                                         |                    |                    |                |
|                    | DIF among confident linking items                                      |                                               |                                         |                    |                    |                |
|                    |                                                                        | Three word delayed recall                     | N/A                                     |                    |                    | No DIF         |
|                    |                                                                        | Three word immediate registration             | N/A                                     |                    |                    | No DIF         |
|                    | DIF among tentative linking items, with no anchors                     |                                               |                                         |                    |                    |                |
|                    |                                                                        | Logical Memory immediate                      | N/A                                     |                    |                    | No DIF         |
|                    |                                                                        | Logical Memory delay                          | 3.49                                    | 3.01               | 3.97               | DIF            |
|                    |                                                                        | CERAD constructional praxis delay             | -1.76                                   | -2.10              | -1.43              | DIF            |
|                    |                                                                        | Logical memory recognition                    | -0.17                                   | -0.46              | 0.12               | DIF            |
| <b>ELSA-HCAP</b>   |                                                                        |                                               |                                         |                    |                    |                |
|                    | DIF among confident linking items                                      |                                               |                                         |                    |                    |                |
|                    |                                                                        | Three word delayed recall                     | 0.51                                    | 0.48               | 0.54               | Negligible     |
|                    |                                                                        | Three word immediate registration             | 1.43                                    | 1.25               | 1.63               | Negligible     |
|                    |                                                                        | CERAD immediate sum of 3 trials               | N/A                                     |                    |                    | No DIF         |
|                    |                                                                        | CERAD word list delay                         | N/A                                     |                    |                    | No DIF         |
|                    |                                                                        | CERAD constructional praxis delay             | 1.47                                    | 1.27               | 1.66               | Negligible     |
|                    |                                                                        | CERAD recognition                             | N/A                                     |                    |                    | No DIF         |
|                    | DIF among tentative linking items, treating confident items as anchors |                                               |                                         |                    |                    |                |
|                    |                                                                        | Logical Memory immediate                      | -2.05                                   | -2.27              | -1.82              | DIF            |
|                    |                                                                        | Logical memory recognition                    | 0.45                                    | 0.30               | 0.60               | DIF            |
|                    |                                                                        | Brave man delay (East Boston Memory Test)     | 1.68                                    | 1.58               | 1.78               | DIF            |
|                    |                                                                        | Brave man immediate (East Boston Memory Test) | 2.29                                    | 2.17               | 2.42               | DIF            |
|                    |                                                                        | Logical Memory delay                          | N/A                                     |                    |                    | No DIF         |
| <b>LASI-DAD</b>    |                                                                        |                                               |                                         |                    |                    |                |

|             |                                                                        |       |       |       |            |
|-------------|------------------------------------------------------------------------|-------|-------|-------|------------|
|             | DIF among confident linking items                                      |       |       |       |            |
|             | Logical Memory delay                                                   | -0.34 | -0.56 | -0.12 | DIF        |
|             | Three word delayed recall                                              | 0.86  | 0.81  | 0.92  | Negligible |
|             | Brave man delay (East Boston Memory Test)                              | 1.83  | 1.73  | 1.93  | DIF        |
|             | Brave man immediate (East Boston Memory Test)                          | 1.58  | 1.49  | 1.66  | DIF        |
|             | Three word immediate registration                                      | N/A   |       |       | No DIF     |
|             | Logical Memory immediate                                               | N/A   |       |       | No DIF     |
|             | Logical memory recognition                                             | N/A   |       |       | No DIF     |
|             | DIF among tentative linking items, treating confident items as anchors |       |       |       |            |
|             | CERAD constructional praxis delay                                      | -0.89 | -1.07 | -0.72 | DIF        |
| Mex-Cog     | DIF among confident linking items                                      |       |       |       |            |
|             | CERAD constructional praxis delay                                      | N/A   |       |       | No DIF     |
|             | DIF among tentative linking items, treating confident items as anchors |       |       |       |            |
|             | Logical Memory immediate                                               | -2.72 | -2.94 | -2.49 | DIF        |
|             | Logical Memory delay                                                   | -1.73 | -1.98 | -1.47 | DIF        |
|             | Three word delayed recall                                              | 0.80  | 0.75  | 0.86  | Negligible |
|             | Brave man delay (East Boston Memory Test)                              | 1.69  | 1.60  | 1.80  | DIF        |
|             | Brave man immediate (East Boston Memory Test)                          | N/A   |       |       | No DIF     |
|             | Three word immediate registration                                      | N/A   |       |       | No DIF     |
| CHARLS-HCAP | DIF among confident linking items                                      |       |       |       |            |
|             | Three word delayed recall                                              | N/A   |       |       | No DIF     |
|             | Three word immediate registration                                      | N/A   |       |       | No DIF     |
|             | DIF among tentative linking items, treating confident items as anchors |       |       |       |            |
|             | CERAD immediate sum of 3 trials                                        | -0.14 | -0.35 | 0.07  | Negligible |
|             | CERAD word list delay                                                  | 0.92  | 0.82  | 1.01  | Negligible |
|             | CERAD recognition                                                      | 0.87  | 0.73  | 1.01  | Negligible |

23 Legend. Odds Ratios (OR) illustrate the difference (on an odds scale) in outcome between and a given study and HRS-HCAP, adjusting for the latent ability. An  
24 OR greater than 1 implies better performance than expected on the item in the focal study, compared to HRS-HCAP, whereas an OR less than 1 indicates better  
25 performance on the item than expected in HRS-HCAP, compared to the focal study.  
26 N/A =Not Applicable. This is shown when an item is present in a given study, but no DIF was detected; in these cases the “Interpretation” column notes “No  
27 DIF” was detected.  
28 a Reference group is HRS-HCAP.  
29 b Interpretation of the magnitude of DIF as negligible (between 0.66 and 1.5) or nonnegligible (DIF).  
30

31 **Supplementary Table 9. Results of differential item functioning among confident and tentative linking items for the orientation domain: Results from**  
 32 **HCAP studies (N=21,144)**

| Study              | Stage of DIF testing                                                   | Cognitive test item   | Association with cohort (REF: HRS-HCAP) | 95% CI lower bound | 95% CI upper bound | Interpretation |
|--------------------|------------------------------------------------------------------------|-----------------------|-----------------------------------------|--------------------|--------------------|----------------|
| <b>HAALSI-HCAP</b> |                                                                        |                       |                                         |                    |                    |                |
|                    | DIF among confident linking items                                      |                       |                                         |                    |                    |                |
|                    |                                                                        | Day of month          | N/A                                     |                    |                    | No DIF         |
|                    |                                                                        | Month                 | 0.57                                    | 0.50               | 0.65               | DIF            |
|                    |                                                                        | Year                  | 2.11                                    | 1.90               | 2.35               | DIF            |
|                    |                                                                        | What state are we in  | 0.16                                    | 0.13               | 0.19               | DIF            |
|                    |                                                                        | Day of the week       | N/A                                     |                    |                    | No DIF         |
|                    |                                                                        | What city are we in   | N/A                                     |                    |                    | No DIF         |
|                    | DIF among tentative linking items, treating confident items as anchors |                       |                                         |                    |                    |                |
|                    |                                                                        | Floor of building     | N/A                                     |                    |                    | No DIF         |
|                    |                                                                        | Season of year        | N/A                                     |                    |                    | No DIF         |
| <b>ELSA-HCAP</b>   |                                                                        |                       |                                         |                    |                    |                |
|                    | DIF among confident linking items                                      |                       |                                         |                    |                    |                |
|                    |                                                                        | Day of month          | N/A                                     |                    |                    | No DIF         |
|                    |                                                                        | Month                 | N/A                                     |                    |                    | No DIF         |
|                    |                                                                        | Year                  | N/A                                     |                    |                    | No DIF         |
|                    |                                                                        | Day of the week       | N/A                                     |                    |                    | No DIF         |
|                    |                                                                        | What city are we in   | N/A                                     |                    |                    | No DIF         |
|                    | DIF among tentative linking items, treating confident items as anchors |                       |                                         |                    |                    |                |
|                    |                                                                        | Season of year        | 1.66                                    | 1.48               | 1.86               | DIF            |
|                    |                                                                        | Address               | 1.38                                    | 1.20               | 1.59               | Negligible     |
|                    |                                                                        | What county are we in | N/A                                     |                    |                    | No DIF         |
| <b>LASI-DAD</b>    |                                                                        |                       |                                         |                    |                    |                |
|                    | DIF among confident linking items                                      |                       |                                         |                    |                    |                |
|                    |                                                                        | Day of month          | 1.35                                    | 1.23               | 1.48               | Negligible     |

|                                                                        |      |      |      |            |
|------------------------------------------------------------------------|------|------|------|------------|
| Year                                                                   | 1.35 | 1.26 | 1.46 | Negligible |
| Day of the week                                                        | 0.81 | 0.73 | 0.90 | Negligible |
| What state are we in                                                   | 0.28 | 0.24 | 0.32 | DIF        |
| Season of year                                                         | 1.47 | 1.33 | 1.63 | Negligible |
| Month                                                                  | N/A  |      |      | No DIF     |
| What city are we in                                                    | N/A  |      |      | No DIF     |
| DIF among tentative linking items, treating confident items as anchors |      |      |      |            |
| Floor of building                                                      | N/A  |      |      | No DIF     |
| Address                                                                | N/A  |      |      | No DIF     |

Mex-Cog

|                                                                        |     |  |  |        |
|------------------------------------------------------------------------|-----|--|--|--------|
| DIF among confident linking items                                      |     |  |  |        |
| Day of month                                                           | N/A |  |  | No DIF |
| Month                                                                  | N/A |  |  | No DIF |
| Year                                                                   | N/A |  |  | No DIF |
| Day of the week                                                        | N/A |  |  | No DIF |
| What state are we in                                                   | N/A |  |  | No DIF |
| DIF among tentative linking items, treating confident items as anchors |     |  |  |        |
| None                                                                   |     |  |  |        |

CHARLS-HCAP

|                                                                        |      |      |      |            |
|------------------------------------------------------------------------|------|------|------|------------|
| DIF among confident linking items                                      |      |      |      |            |
| Year                                                                   | 0.71 | 0.66 | 0.77 | Negligible |
| Day of the week                                                        | 0.44 | 0.41 | 0.48 | DIF        |
| What state are we in                                                   | 0.66 | 0.57 | 0.76 | Negligible |
| What county are we in                                                  | 1.50 | 1.38 | 1.62 | Negligible |
| Address                                                                | 1.79 | 1.63 | 1.96 | DIF        |
| Day of month                                                           | N/A  |      |      | No DIF     |
| Month                                                                  | N/A  |      |      | No DIF     |
| What city are we in                                                    | N/A  |      |      | No DIF     |
| Floor of building                                                      | N/A  |      |      | No DIF     |
| DIF among tentative linking items, treating confident items as anchors |      |      |      |            |
| Season of year                                                         | N/A  |      |      | No DIF     |

34 Legend. Odds Ratios (OR) illustrate the difference (on an odds scale) in outcome between and a given study and HRS-HCAP, adjusting for the latent ability. An  
35 OR greater than 1 implies better performance than expected on the item in the focal study, compared to HRS-HCAP, whereas an OR less than 1 indicates better  
36 performance on the item than expected in HRS-HCAP, compared to the focal study.  
37 N/A =Not Applicable. This is shown when an item is present in a given study, but no DIF was detected; in these cases the “Interpretation” column notes “No  
38 DIF” was detected.  
39 a Reference group is HRS-HCAP.  
40 b Interpretation of the magnitude of DIF as negligible (between 0.66 and 1.5) or nonnegligible (DIF).  
41  
42



43 **Supplementary Table 10. Validation of the domain-specific cognitive function factors: Results from HCAP studies (N=21,144)**

| Cognitive domain             | Covariate                       | Overall sample        | HRS-HCAP              | ELSA-HCAP             | LASI-DAD              | Mex-Cog               | CHARLS-HCAP           | HAALSI-HCAP           |
|------------------------------|---------------------------------|-----------------------|-----------------------|-----------------------|-----------------------|-----------------------|-----------------------|-----------------------|
|                              |                                 | Beta coefficient (SE) |
| <b>Orientation</b>           |                                 |                       |                       |                       |                       |                       |                       |                       |
|                              | Female gender                   | -0.15* (-0.18, -0.13) | 0.03 (-0.01, 0.07)    | -0.01 (-0.09, 0.07)   | -0.36* (-0.41, -0.31) | -0.37* (-0.45, -0.30) | -0.16* (-0.20, -0.13) | -0.33* (-0.46, -0.20) |
|                              | Age group                       |                       |                       |                       |                       |                       |                       |                       |
|                              | 50-59 years                     | 0.01 (-0.06, 0.08)    | N/A                   | N/A                   | N/A                   | -0.01 (-0.12, 0.09)   | N/A                   | 0.28* (0.09, 0.46)    |
|                              | 60-69 years                     | REF                   |
|                              | 70-79 years                     | -0.09* (-0.11, -0.06) | -0.05 (-0.11, 0.00)   | -0.11* (-0.21, -0.01) | -0.19* (-0.25, -0.14) | -0.21* (-0.30, -0.12) | -0.10* (-0.14, -0.06) | -0.34* (-0.51, -0.16) |
|                              | 80-89 years                     | -0.26* (-0.30, -0.23) | -0.25* (-0.31, -0.19) | -0.40* (-0.51, -0.29) | -0.42* (-0.51, -0.34) | -0.59* (-0.72, -0.46) | -0.24* (-0.31, -0.17) | -0.62* (-0.82, -0.43) |
|                              | 90+ years                       | -0.64* (-0.72, -0.56) | -0.59* (-0.69, -0.49) | -0.87* (-1.08, -0.66) | -0.80* (-0.97, -0.62) | -1.19* (-1.47, -0.90) | -0.35* (-0.68, -0.02) | -0.79* (-1.13, -0.44) |
|                              | Education                       |                       |                       |                       |                       |                       |                       |                       |
|                              | No or Early Childhood Education | -0.93* (-0.96, -0.89) | -0.42* (-0.69, -0.15) | -0.64 (-1.43, 0.16)   | -0.96* (-1.06, -0.87) | -0.69* (-0.80, -0.58) | -0.76* (-0.81, -0.71) | -0.70* (-1.02, -0.38) |
|                              | Primary education               | -0.30* (-0.34, -0.26) | -0.44* (-0.56, -0.32) | N/A                   | -0.21* (-0.32, -0.10) | -0.16* (-0.28, -0.03) | -0.20* (-0.25, -0.14) | -0.15 (-0.47, 0.17)   |
|                              | Lower secondary                 | REF                   |
|                              | Upper secondary                 | 0.28* (0.24, 0.32)    | 0.23* (0.16, 0.29)    | 0.07 (-0.03, 0.17)    | 0.24* (0.13, 0.36)    | 0.04 (-0.20, 0.27)    | 0.11* (0.04, 0.19)    | 0.10 (-0.32, 0.51)    |
|                              | Any college                     | 0.40* (0.35, 0.45)    | 0.29* (0.22, 0.36)    | 0.15* (0.06, 0.24)    | 0.38* (0.23, 0.52)    | 0.27* (0.11, 0.42)    | 0.29* (0.14, 0.44)    | 0.19 (-0.35, 0.74)    |
| <b>Memory</b>                |                                 |                       |                       |                       |                       |                       |                       |                       |
|                              | Female gender                   | 0.14* (0.12, 0.17)    | 0.32* (0.26, 0.37)    | 0.17* (0.07, 0.26)    | 0.08* (0.03, 0.12)    | 0.19* (0.13, 0.24)    | 0.02 (-0.01, 0.06)    | -0.00 (-0.10, 0.09)   |
|                              | Age group                       |                       |                       |                       |                       |                       |                       |                       |
|                              | 50-59 years                     | 0.11* (0.05, 0.18)    | N/A                   | N/A                   | N/A                   | 0.17* (0.09, 0.24)    | N/A                   | 0.24* (0.10, 0.38)    |
|                              | 60-69 years                     | REF                   |
|                              | 70-79 years                     | -0.18* (-0.21, -0.16) | -0.24* (-0.32, -0.17) | -0.44* (-0.57, -0.31) | -0.27* (-0.32, -0.22) | -0.33* (-0.40, -0.27) | -0.23* (-0.26, -0.19) | -0.28* (-0.40, -0.15) |
|                              | 80-89 years                     | -0.49* (-0.53, -0.46) | -0.72* (-0.80, -0.64) | -0.98* (-1.12, -0.84) | -0.61* (-0.68, -0.53) | -0.76* (-0.85, -0.66) | -0.39* (-0.46, -0.32) | -0.52* (-0.67, -0.38) |
|                              | 90+ years                       | -0.95* (-1.03, -0.87) | -1.29* (-1.42, -1.16) | -1.46* (-1.73, -1.19) | -0.93* (-1.07, -0.78) | -1.17* (-1.38, -0.97) | -0.53* (-0.85, -0.21) | -0.67* (-0.93, -0.41) |
|                              | Education                       |                       |                       |                       |                       |                       |                       |                       |
|                              | No or Early Childhood Education | -0.92* (-0.95, -0.88) | -0.26 (-0.61, 0.09)   | 0.03 (-0.98, 1.03)    | -0.62* (-0.70, -0.53) | -0.61* (-0.69, -0.54) | -0.89* (-0.94, -0.84) | -0.49* (-0.73, -0.25) |
|                              | Primary education               | -0.30* (-0.34, -0.26) | -0.41* (-0.57, -0.25) | N/A                   | -0.15* (-0.25, -0.05) | -0.19* (-0.28, -0.10) | -0.25* (-0.30, -0.19) | -0.23 (-0.47, 0.01)   |
|                              | Lower secondary                 | REF                   |
|                              | Upper secondary                 | 0.37* (0.33, 0.41)    | 0.43* (0.35, 0.52)    | 0.26* (0.13, 0.39)    | 0.29* (0.19, 0.39)    | 0.05 (-0.12, 0.22)    | 0.17* (0.09, 0.24)    | 0.10 (-0.20, 0.41)    |
|                              | Any college                     | 0.68* (0.63, 0.73)    | 0.75* (0.66, 0.85)    | 0.48* (0.36, 0.59)    | 0.43* (0.30, 0.55)    | 0.33* (0.22, 0.45)    | 0.42* (0.27, 0.57)    | 0.38 (-0.03, 0.78)    |
| <b>Executive functioning</b> |                                 |                       |                       |                       |                       |                       |                       |                       |
|                              | Female gender                   | -0.16* (-0.18, -0.13) | 0.04 (-0.02, 0.09)    | -0.04 (-0.14, 0.06)   | -0.20* (-0.24, -0.16) | -0.19* (-0.26, -0.12) | -0.12* (-0.15, -0.09) | -0.16* (-0.25, -0.07) |
|                              | Age group                       |                       |                       |                       |                       |                       |                       |                       |
|                              | 50-59 years                     | 0.14* (0.07, 0.21)    | N/A                   | N/A                   | N/A                   | 0.19* (0.10, 0.28)    | N/A                   | 0.17* (0.04, 0.29)    |
|                              | 60-69 years                     | REF                   |
|                              | 70-79 years                     | -0.23* (-0.26, -0.21) | -0.27* (-0.34, -0.20) | -0.47* (-0.60, -0.35) | -0.17* (-0.21, -0.13) | -0.41* (-0.49, -0.33) | -0.04* (-0.07, -0.01) | -0.29* (-0.41, -0.18) |
|                              | 80-89 years                     | -0.72* (-0.75, -0.68) | -0.77* (-0.85, -0.70) | -1.02* (-1.16, -0.89) | -0.37* (-0.43, -0.30) | -0.82* (-0.94, -0.70) | -0.21* (-0.26, -0.16) | -0.51* (-0.64, -0.37) |
|                              | 90+ years                       | -1.27* (-1.35, -1.19) | -1.25* (-1.38, -1.12) | -1.76* (-2.02, -1.50) | -0.66* (-0.79, -0.53) | -0.97* (-1.22, -0.73) | -0.38* (-0.66, -0.10) | -0.67* (-0.90, -0.43) |
|                              | Education                       |                       |                       |                       |                       |                       |                       |                       |

|          |                                 |                       |                       |                       |                       |                       |                       |                       |
|----------|---------------------------------|-----------------------|-----------------------|-----------------------|-----------------------|-----------------------|-----------------------|-----------------------|
|          | No or Early Childhood Education | -0.82* (-0.85, -0.78) | -0.88* (-1.22, -0.54) | -1.10* (-2.07, -0.13) | -0.85* (-0.93, -0.78) | -1.39* (-1.49, -1.30) | -0.44* (-0.47, -0.40) | -0.54* (-0.75, -0.32) |
|          | Primary education               | -0.16* (-0.20, -0.12) | -0.67* (-0.82, -0.51) | N/A                   | -0.21* (-0.30, -0.12) | -0.59* (-0.70, -0.49) | -0.15* (-0.19, -0.12) | -0.14 (-0.36, 0.08)   |
|          | Lower secondary                 | REF                   |
|          | Upper secondary                 | 0.24* (0.21, 0.28)    | 0.78* (0.70, 0.86)    | 0.43* (0.30, 0.55)    | 0.33* (0.25, 0.42)    | 0.18 (-0.02, 0.39)    | 0.18* (0.13, 0.22)    | 0.33* (0.05, 0.61)    |
|          | Any college                     | 0.66* (0.61, 0.71)    | 1.22* (1.13, 1.31)    | 0.59* (0.47, 0.70)    | 0.64* (0.52, 0.75)    | 0.64* (0.50, 0.78)    | 0.43* (0.34, 0.53)    | 0.55* (0.18, 0.92)    |
| Language |                                 |                       |                       |                       |                       |                       |                       |                       |
|          | Female gender                   | 0.03* (0.01, 0.05)    | 0.02 (-0.03, 0.07)    | -0.08 (-0.19, 0.02)   | -0.13* (-0.17, -0.09) | 0.01 (-0.06, 0.07)    | -0.04* (-0.07, -0.02) | -0.32* (-0.41, -0.23) |
|          | Age group                       |                       |                       |                       |                       |                       |                       |                       |
|          | 50-59 years                     | 0.51* (0.44, 0.57)    | N/A                   | N/A                   | N/A                   | 0.01 (-0.07, 0.09)    | N/A                   | 0.04 (-0.09, 0.17)    |
|          | 60-69 years                     | REF                   |
|          | 70-79 years                     | -0.02 (-0.04, 0.00)   | -0.08* (-0.14, -0.01) | -0.44* (-0.57, -0.30) | -0.15* (-0.20, -0.10) | -0.18* (-0.26, -0.11) | -0.10* (-0.13, -0.07) | -0.21* (-0.33, -0.09) |
|          | 80-89 years                     | -0.24* (-0.27, -0.21) | -0.43* (-0.49, -0.36) | -0.84* (-0.99, -0.70) | -0.36* (-0.43, -0.29) | -0.55* (-0.65, -0.45) | -0.36* (-0.41, -0.31) | -0.45* (-0.59, -0.32) |
|          | 90+ years                       | -0.53* (-0.60, -0.45) | -0.81* (-0.92, -0.70) | -1.27* (-1.54, -0.99) | -0.76* (-0.90, -0.61) | -0.89* (-1.11, -0.66) | -0.47* (-0.73, -0.21) | -0.52* (-0.76, -0.28) |
|          | Education                       |                       |                       |                       |                       |                       |                       |                       |
|          | No or Early Childhood Education | -0.75* (-0.78, -0.72) | -0.24 (-0.55, 0.06)   | -0.74 (-1.79, 0.30)   | -0.49* (-0.57, -0.41) | -0.77* (-0.85, -0.68) | -0.58* (-0.62, -0.54) | -0.53* (-0.75, -0.31) |
|          | Primary education               | -0.36* (-0.39, -0.32) | -0.29* (-0.43, -0.15) | N/A                   | -0.17* (-0.27, -0.08) | -0.28* (-0.38, -0.18) | -0.22* (-0.26, -0.17) | -0.15 (-0.37, 0.07)   |
|          | Lower secondary                 | REF                   |
|          | Upper secondary                 | 0.39* (0.36, 0.43)    | 0.41* (0.34, 0.49)    | 0.25* (0.12, 0.38)    | 0.15* (0.06, 0.25)    | -0.12 (-0.31, 0.07)   | 0.29* (0.23, 0.35)    | 0.36* (0.08, 0.64)    |
|          | Any college                     | 0.84* (0.79, 0.88)    | 0.72* (0.64, 0.80)    | 0.49* (0.37, 0.61)    | 0.23* (0.10, 0.35)    | 0.37* (0.24, 0.50)    | 0.65* (0.53, 0.76)    | 0.64* (0.27, 1.01)    |

44 Legend. Beta coefficients represent overall and study-specific differences in cognitive functioning between a given exposure grouping and the reference  
45 category. For age, persons aged 60-69 comprised the reference group. For education, persons with a lower secondary education comprised the reference group.  
46 Models for each exposure are mutually adjusted for other exposures in this table. N/A = Not applicable (e.g., no observations in the group)  
47 \* p<0.05

48 **Supplementary Figure 1: Flowchart of item banking procedure implemented to statistically harmonize**  
 49 **cognition across HCAP studies**

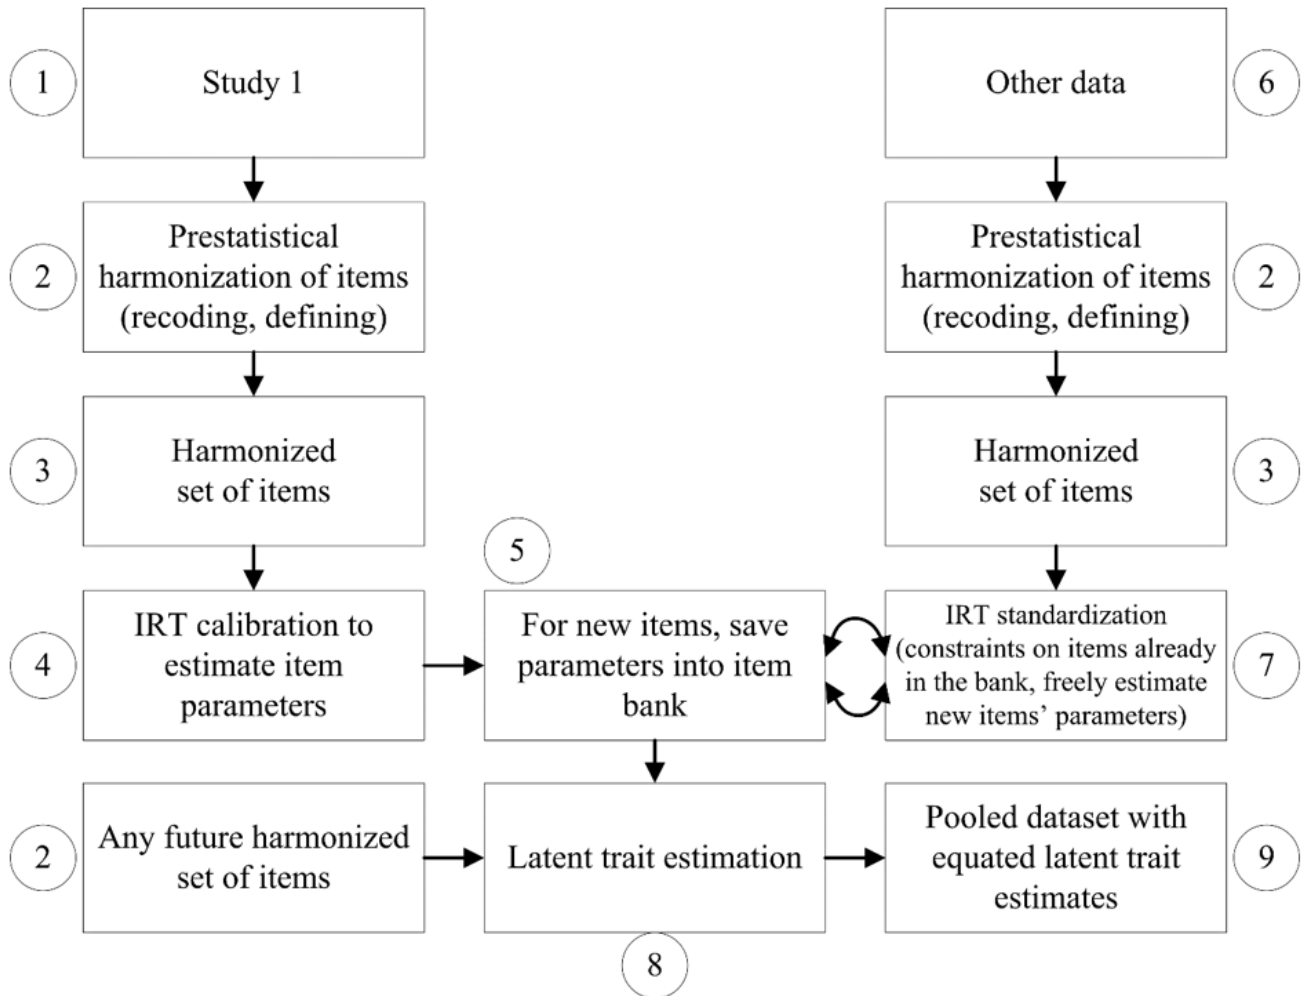

50  
 51 Legend. This procedure was implemented separately for cognitive domains of orientation, memory, executive  
 52 functioning, language, and general cognitive performance. Starting with a reference study, HRS-HCAP (step 1), pre-  
 53 statistical harmonization was conducted by recoding and redefining cognitive test items as needed. Minor  
 54 transformations were performed as needed to handle missing data and outlying values (step 2), resulting in a  
 55 harmonized set of cognitive test items to support a measurement model (step 3). Step 4 entails calibration via item  
 56 response theory methods (equivalent to confirmatory factor analysis, CFA) to freely estimate item parameters  
 57 including factor loadings, and thresholds (for categorical test items) or intercepts (for continuous test items).  
 58 Resulting item parameters are saved into an item bank (step 5). Next, additional studies are serially brought in (step  
 59 6) to have their cognitive test items recoded as necessary in the same manner as in other studies (step 2 at right),  
 60 resulting in a unique set of harmonized cognitive test items for a study (step 3 at right). In step 7, item response  
 61 theory standardization is implemented with a CFA model that places constraints on parameters for items in  
 62 common between the other study and HRS-HCAP as well as previous studies already processed, and freely  
 63 estimates parameters for items unique to the new study. Parameters for these new items are iteratively added to the  
 64 item bank (step 5), such that eventually any future harmonized set of items can be used to estimate latent traits (step  
 65 8) and save out factor scores into a pooled dataset for all included studies (step 9).  
 66  
 67

68 **Supplemental Table 11. Number of participants with scores with salient DIF by HCAP study and cognitive**  
 69 **domain, prior to DIF adjustment: Results from HCAP studies (N=21,144)**

70

| Domain                | HRS-<br>HCAP<br>(N=3347) | ELSA-<br>HCAP<br>(N=1273) | LASI-DAD<br>(N=1777) | Mex-Cog<br>(N=2042) | CHARLS-<br>HCAP<br>(N=9755) | HAALSI-<br>HCAP<br>(N=631) |
|-----------------------|--------------------------|---------------------------|----------------------|---------------------|-----------------------------|----------------------------|
|                       |                          | n (%)                     | n (%)                | n (%)               | n (%)                       | n (%)                      |
| Memory                | Ref                      | 2 (0.2%)                  | 1 (<0.1%)            | 105 (5.1%)          | 216 (2.2%)                  | 0                          |
| Orientation           | Ref                      | 22 (1.7%)                 | 290 (16.3%)          | 0                   | 23 (0.2%)                   | 326 (51.7%)                |
| Language/fluency      | Ref                      | 57 (4.5%)                 | 23 (0.6%)            | 50 (2.4%)           | 6668 (68.4%)                | 6 (0.9%)                   |
| Executive<br>function | Ref                      | 0                         | 0                    | NA                  | NA                          | 0                          |

71 Legend. Salience of DIF was calculated as the difference between DIF-adjusted and non-DIF-adjusted factor scores.  
 72 The number of participants whose DIF-adjusted scores differed by more than 0.3 SDs from non-DIF-adjusted scores  
 73 are shown here. DIF=differential item functioning. HCAP=Harmonized Cognitive Assessment Protocol. HRS=US  
 74 Health and Retirement Study. ELSA=English Longitudinal Study on Ageing. LASI-DAD=Longitudinal Aging  
 75 Study in India-Diagnostic Assessment of Dementia. Mex-Cog=Mexican Health and Aging Study Cognitive Aging  
 76 Ancillary Study. CHARLS=China Health and Retirement Longitudinal Study. HAALSI=Health and Aging in  
 77 Africa: A Longitudinal Study in South Africa. NA=not applicable (no overlap).

78

79
